# Supplementary material
Source: PubMed Central journal article supplement (PMC3019124)

## Supplementary Information

### Genome-wide association study identifies a locus at 7p15.2 associated with endometriosis

Jodie N. Painter<sup>1,13</sup>, Carl A. Anderson<sup>2,3,13</sup>, Dale R. Nyholt<sup>4,13</sup>, Stuart Macgregor<sup>5</sup>, Jianghai Lin<sup>6</sup>, Sang Hong Lee<sup>5</sup>, Ann Lambert<sup>6</sup>, Zhen Z. Zhao<sup>1</sup>, Fenella Roseman<sup>6</sup>, Qun Guo<sup>7</sup>, Scott D. Gordon<sup>8</sup>, Leanne Wallace<sup>1</sup>, Anjali K. Henders<sup>1</sup>, Peter M. Visscher<sup>5</sup>, Peter Kraft<sup>9,10</sup>, Nicholas G. Martin<sup>8</sup>, Andrew P. Morris<sup>2</sup>, Susan A. Treloar<sup>1,11,14</sup>, Stephen H. Kennedy<sup>6,14</sup>, Stacey A. Missmer<sup>7,9,12,14</sup>, Grant W. Montgomery<sup>1,14</sup>, and Krina T. Zondervan<sup>2,6,14</sup>

1. Molecular Epidemiology, Queensland Institute of Medical Research, 300 Herston Rd, Herston, QLD 4006, Australia
2. Genetic and Genomic Epidemiology Unit, Wellcome Trust Centre for Human Genetics, University of Oxford, Oxford, OX3 7BN, UK
3. Wellcome Trust Sanger Institute, Wellcome Trust Genome Campus, Hinxton, CB10 2HH, UK
4. Neurogenetics Laboratory, Queensland Institute of Medical Research, 300 Herston Rd, Herston, QLD 4006, Australia
5. Queensland Statistical Genetics, Queensland Institute of Medical Research, 300 Herston Rd, Herston, QLD 4006, Australia
6. Nuffield Department of Obstetrics and Gynaecology, University of Oxford, John Radcliffe Hospital, Oxford, OX3 9DU, UK
7. Channing Laboratory, Department of Medicine, Brigham and Women's Hospital and Harvard Medical School, 181 Longwood Avenue, Boston, MA 02115, USA
8. Genetic Epidemiology, Queensland Institute of Medical Research, 300 Herston Rd, Herston, QLD 4006, Australia
9. Department of Epidemiology, Harvard School of Public Health, 677 Huntington Avenue, Kresge Building, Boston, MA 02115, USA
10. Department of Biostatistics, Harvard School of Public Health, 655 Huntington Avenue, SPH2, 4th Floor Boston, MA 02115, USA.
11. Centre for Military and Veterans' Health, The University of Queensland, Mayne Medical School, 288 Herston Road, QLD 4006, Australia
12. Department of Obstetrics, Gynecology and Reproductive Biology, Brigham and Women's Hospital and Harvard Medical School, 75 Francis Street, Boston, MA 02115, USA
13. These authors contributed equally to the work
14. These authors jointly directed the work

#### Corresponding authors:

Dr Krina T. Zondervan  
Genetic and Genomic Epidemiology Unit, Wellcome Trust Centre for Human Genetics, Roosevelt Drive, Oxford OX3 7BN, United Kingdom  
Tel: +44 1865 287627  
Fax: +44 1865 287501  
Email: [krina.zondervan@well.ox.ac.uk](mailto:krina.zondervan@well.ox.ac.uk)

Dr Jodie N. Painter  
Molecular Epidemiology, Queensland Institute of Medical Research, 300 Herston Rd, Herston, QLD, 4006, Australia  
Tel: +61 (0)7 3362 0214  
Fax: +61 (0)7 3362 0101  
Email: [jodie.painter@qimr.edu.au](mailto:jodie.painter@qimr.edu.au)

# Genome-wide association study identifies a locus at 7p15.2 associated with endometriosis

## Supplementary Note, Tables and Figures

### Contents

#### Supplementary Note.

**Supplementary Table 1.** Numbers and phenotypic characteristics of endometriosis cases and controls by dataset.

**Supplementary Table 2.** Estimates of proportion of variation due to common SNPs for all endometriosis, stage A and stage B endometriosis in the QIMR and Oxford cases.

**Supplementary Table 3.** GWA (“all” endometriosis and Stage B), replication and meta-analysis results for 73 SNPs passing the inclusion threshold for replication and for which genotype data were available in the NHS control dataset. SNPs are sorted by chromosomal location. The rs12700667 SNP reaching genome-wide significance in the meta-analysis is highlighted in bold.

**Supplementary Table 4.** Japanese<sup>26</sup>, QIMR and Oxford “all” endometriosis and meta-analysis results for 93 of the top 100 SNPs in Uno *et al.*<sup>26</sup> for which we had genotype data passing QC. SNPs with nominal evidence for replication ( $P \leq 0.05$  and effect in the same direction) in the QIMR and Oxford data are highlighted in bold.

**Supplementary Figure 1.** Post-QC Q-Q plots assessing genomic inflation of observed vs. expected chisquare statistic a) comparing women vs. men among WTCCC and QIMR controls; b) in GWA of Oxford/WTCCC, QIMR/QIMR and combined datasets.

**Supplementary Figure 2.** Allele specific score prediction for ‘all’ and stage B endometriosis, using (a, b) QIMR as discovery and Oxford as target datasets and (c, d) Oxford as discovery and QIMR as target datasets.

**Supplementary Figure 3.** Genome-wide association results from Cochran-Mantel-Haenszel tests for (a) “all” endometriosis and (b) stage B endometriosis in QIMR and Oxford datasets. Green points indicate SNPs with  $P < 1 \times 10^{-5}$ .

## Supplementary Note

**QIMR and Oxford sample information.** In total, 8,967 individuals, consisting of 3,908 endometriosis patients and their family members, were recruited by The Queensland Institute of Medical Research (QIMR), Brisbane, Australia, between 1995-2002 (each completing a questionnaire and providing a blood sample). Surgical diagnosis for all endometriosis cases was confirmed from retrospective examination of medical records<sup>1</sup>. The QIMR case sample consisted of one case per family from 931 families with affected sister pairs and other affected relatives, a case from each of 980 triad families (one affected plus her parents) and a further 440 cases with no ascertained family members. QIMR controls were a sample of 1,870 parents and siblings of adolescent twins recruited as part of the Brisbane Adolescent Twin Study<sup>2,3</sup>, where adolescent twins, their siblings and parents were recruited through schools around Brisbane, Australia. Approval to obtain medical records, for collection of blood for DNA extraction and all questionnaires and interview schedules, and for the inclusion of some twins from the Australian Twin Registry, was obtained from the QIMR Human Research Ethics Committee (HREC). All participants gave written informed consent.

From 1995-2006, the Oxford Endometriosis Gene (OXEGENE) study, Oxford, UK, recruited 245 families with  $\geq 2$  affected sisters with surgically confirmed endometriosis, and 785 single cases. All cases were aged  $\geq 18$  years and of self-reported European descent. Surgical confirmation was obtained for 97% of cases from medical records. Of the 924 cases included in the GWA after genotyping quality control, 81% were from the UK, 10% from other European countries and 9% from the US. Oxford controls consisted of 3,000 individuals from the 1958 British Birth Cohort and 3,000 individuals from National Blood Service donors provided by the Wellcome Trust Case Control Consortium 2 (WTCCC2). The study received approval from the regional Multi-centre and Local Research Ethics Committees.

The QIMR and Oxford studies used the same principles for confirmation of diagnosis and staging of disease, based on the revised American Fertility Society (rAFS) classification system<sup>4</sup>. Disease severity was assessed retrospectively from medical records by use of the rAFS classification system, which assigns patients to one of four stages (I–IV) on the basis of the extent of disease and the associated adhesions present. As it can be difficult retrospectively to stage disease accurately using clinical records alone, a simplified two-stage system was used<sup>4,5</sup>: stage A (rAFS I-II or some ovarian disease plus a few adhesions) and stage B (rAFS III-IV). Of the 3,194 cases included in the GWA analysis, 1,686 had stage A disease (52.7%), 1,364 stage B disease (42.7%), whilst 144 (4.6%) had unknown disease stage. Additional phenotypic data for both datasets are shown in **Supplementary Table 1**.

**Harvard sample information.** The replication cohort of endometriosis cases were drawn from US Nurses' Health Study (NHS) II<sup>6,7</sup>, a prospective cohort study with follow-up from 1989-2007. Biennially, 116,678 registered female nurses – aged 25-53 and residing in 14 of the US states – complete questionnaire information on incidence of disease outcomes and biological, environmental, dietary, and life-style risk factors. From 1996-1998, blood samples were collected from 29,613 participants 32-53 years of age. Women were asked if they had “ever had physician-diagnosed endometriosis”, the date of diagnosis, and

whether diagnosis had been confirmed by laparoscopy. To assess the validity of self-reported endometriosis, the laparoscopy records of 200 randomly selected women who had reported a diagnosis from 1989-1993 were sought; the diagnosis was confirmed in 96% of 105 women who had surgery and whose records were available<sup>6,7</sup>. The US case dataset comprised 2,392 cases with a self-reported laparoscopy-confirmed diagnosis of endometriosis and available blood samples, all of self-reported European descent.

The US controls were selected from two previous GWA studies conducted in the Nurses' Health Study I (NHS) and NHSII, including 1,142 postmenopausal, breast-cancer-free subjects from a study of breast cancer<sup>8</sup> and 1,129 (504 NHS, 625 NHSII) subjects from a genome-wide association study of kidney function<sup>9</sup>. The NHS (control) cohort was initiated in 1976 with 121,700 female registered nurses aged 30-55. Participants completed biannual questionnaires on disease outcomes and biological, environmental, dietary, and life-style risk factors; blood samples were collected between 1989-1990. No endometriosis or symptom-related phenotypic information was available on the controls. All case and control subjects were of self-described European descent and cluster tightly with the HapMap CEU panel. Participant enrolment, questionnaire and clinical data, and biologic sample collection for the NHS and NHSII have been approved by the Human Subject Committee of Harvard School of Public Health and by the Institutional Review Board of Brigham and Women's Hospital.

**Genotyping quality control.** Quality control procedures for the QIMR genotype data have been described in detail<sup>10</sup>. Briefly, individuals with call rates <0.95 then SNPs with a mean BeadStudio GenCall score <0.7, call rates <0.95, Hardy-Weinberg equilibrium  $P < 10^{-6}$ , and MAF <0.01 were excluded. Cryptic relatedness between individuals was identified through a full identity-by-state matrix. Ancestry outliers were identified using data from 11 populations of the HapMap 3 and five Northern European populations genotyped by the GenomeEUtwin consortium, using EIGENSOFT<sup>11</sup>.

Quality control procedures for the Oxford genotype data resulted in the removal of SNPs with a genotype call rate <0.99 and/or heterozygosity <0.31 or >0.33. Genome-wide IBS was estimated for each pair of individuals and one individual from each duplicate or related pair (IBS>0.82) was removed. Genotype data were combined with CEU, CHB&JPT and YRI genotype data from HapMap 3 and individuals of non Northern European ancestry were identified using the EIGENSOFT package<sup>11,12</sup> and subsequently removed. SNPs with a genotype call rate <0.95 were removed, and this threshold was increased to 0.99 for SNPs with MAF <0.05. In addition, SNPs showing a significant a) deviation from HWE ( $P < 1 \times 10^{-6}$ ); b) difference in call rate between 58BC and NBS control groups ( $P < 1 \times 10^{-4}$ ); c) difference in allele/genotype frequency between control groups ( $P < 1 \times 10^{-4}$ ); d) difference in call rate between cases and controls ( $P < 1 \times 10^{-4}$ ) and e) a MAF <0.01 were removed.

**Imputation and subsequent analysis.** In order to assess the impact of variants not present on the Illumina Human670Quad Beadarray, we imputed genotypes using CEU and TSI reference panels from the 1000 Genomes project and HapMap phase III. Imputation was performed using IMPUTEv2<sup>13</sup> with two publicly available reference panels of haplotypes from European ancestry populations: (i) phased CEU (CEPH from Utah) samples from the 1000 Genomes project; and (ii) additional phased CEU samples and

phased TSI (Tuscans from Italy) samples from HapMap phase III. Analysis of imputed genotype data was performed using SNPTESTv2 via a missing data likelihood score test with adjustment for centre as covariate. The quality of imputation was assessed by means of the score test “info” statistic. Results for poorly imputed SNPs, defined to have an info score of less than 40%, were subsequently removed.

### Supplementary References

1. Treloar, S.A. *et al.* Genomewide linkage study in 1,176 affected sister pair families identifies a significant susceptibility locus for endometriosis on chromosome 10q26. *Am. J. Hum. Genet.* **77**, 365-376 (2005).
2. McGregor, B. *et al.* Genetic and environmental contributions to size, color, shape and other characteristics of melanocytic naevi in a sample of adolescent twins. *Genet. Epidemiol.* **16**, 40-53 (1999).
3. Zhu, G. *et al.* A major quantitative-trait locus for mole density is linked to the familial melanoma gene CDKN2A: a maximum-likelihood combined linkage and association analysis in twins and their sibs. *Am. J. Hum. Genet.* **65**, 483-492 (1999).
4. Revised American Fertility Society classification of endometriosis: 1985. *Fertil. Steril.* **43**, 351-352 (1985).
5. Treloar, S. *et al.* The International Endogene Study: a collection of families for genetic research in endometriosis. *Fertil. Steril.* **78**, 679-685 (2002).
6. Missmer, S.A. *et al.* Incidence of laparoscopically confirmed endometriosis by demographic, anthropometric, and lifestyle factors. *Am. J. Epidemiol.* **160**, 784-796 (2004).
7. Vitonis, A.F., Baer, H.J., Hankinson, S.E., Laufer, M.R. & Missmer, S.A. A prospective study of body size during childhood and early adulthood and the incidence of endometriosis. *Hum. Reprod.* **25**, 1325-1334 (2010).
8. Hunter, D.J. *et al.* A genome-wide association study identifies alleles in FGFR2 associated with risk of sporadic postmenopausal breast cancer. *Nat. Genet.* **39**, 870-874 (2007).
9. Curhan, G.C. & Taylor, E.N. 24-h uric acid excretion and the risk of kidney stones. *Kidney Int.* **73**, 489-496 (2008).
10. Medland, S.E. *et al.* Common variants in the trichohyalin gene are associated with straight hair in Europeans. *Am. J. Hum. Genet.* **85**, 750-755 (2009).
11. Price, A.L. *et al.* Principal components analysis corrects for stratification in genome-wide association studies. *Nat. Genet.* **38**, 904-909 (2006).
12. Patterson, N., Price, A.L. & Reich, D. Population structure and eigenanalysis. *PLoS Genet.* **2**, e190 (2006).
13. Howie, B.N., Donnelly, P. & Marchini, J. A flexible and accurate genotype imputation method for the next generation of genome-wide association studies. *PLoS Genet.* **5**, e1000529 (2009).

**Supplementary Table 1.** Numbers and phenotypic characteristics of endometriosis cases and controls by dataset.

| Characteristic                                    | Total        | Dataset      |                   |              |
|---------------------------------------------------|--------------|--------------|-------------------|--------------|
|                                                   |              | QIMR         | Oxford            | NHSII        |
| Total N                                           |              |              |                   |              |
| Cases                                             | 5586         | 2270         | 924               | 2392         |
| Controls                                          | 9331         | 1870         | 5190 <sup>a</sup> | 2271         |
| <i>Endometriosis cases</i>                        |              |              |                   |              |
| Stage (%) <sup>b</sup>                            |              |              |                   |              |
| Stage A                                           | 1686 (30.2%) | 1357 (59.8%) | 329 (35.6%)       | 0 (0%)       |
| Stage B                                           | 1364 (24.4%) | 910 (40.1%)  | 454 (49.1%)       | 0 (0%)       |
| Unknown                                           | 2536 (45.5%) | 3 (0.1%)     | 141 (15.3%)       | 2392(100%)   |
| Mean age at first symptom onset <sup>c</sup> (SD) |              | 19.6 (6.4)   | 22.3 (8.4)        | N/A          |
| Mean age at diagnosis <sup>c</sup> (SD)           |              | 26.7 (7.4)   | 30.1 (7.1)        | 36.9 (6.9)   |
| Number reporting subfertility <sup>c</sup> (%)    |              | 1024 (46.3%) | 344 (43.6%)       | 1204 (50.3%) |
| Number reporting pelvic pain <sup>c</sup> (%)     |              | 1848 (82.7%) | 672 (98.0%)       | N/A          |

<sup>a</sup> Control genotypes for the Oxford dataset were from the Wellcome Trust Case Control Consortium (WTCCC2).

<sup>b</sup> Stage information is currently unavailable for the US cases.

<sup>c</sup> Variables were based on self-report. Age at diagnosis was defined as either age at first diagnosis (QIMR) or age at first surgically confirmed diagnosis (Oxford and NHSII). Subfertility was defined as ever having attempted unsuccessfully to conceive for at least 12 months; pelvic pain as ever having had severe pelvic pain (QIMR), or reporting pelvic pain as reason for gynaecological consultation (Oxford). Percentages were calculated after excluding women with missing information.

**Supplementary Table 2** Estimates of proportion of variation due to common SNPs for all endometriosis, stage A and stage B endometriosis in the QIMR and Oxford cases.

| Phenotypes        | Cases | Controls | Proportion of variation (SE) | P-value               |
|-------------------|-------|----------|------------------------------|-----------------------|
| <b>QIMR</b>       |       |          |                              |                       |
| All Endometriosis | 2235  | 1827     | 0.24 (0.08)                  | $5.0 \times 10^{-4}$  |
| Stage A           | 1340  | 1827     | 0.16 (0.10)                  | $9.0 \times 10^{-2}$  |
| Stage B           | 895   | 1827     | 0.42 (0.11)                  | $1.1 \times 10^{-4}$  |
| <b>Oxford</b>     |       |          |                              |                       |
| All Endometriosis | 921   | 5158     | 0.35 (0.05)                  | $1.5 \times 10^{-12}$ |
| Stage A           | 327   | 5158     | 0.20 (0.06)                  | $5.3 \times 10^{-4}$  |
| Stage B           | 453   | 5158     | 0.30 (0.06)                  | $4.3 \times 10^{-8}$  |

**Supplementary Table 3** GWA (“all” endometriosis and stage B), follow-up and “all endometriosis” meta-analysis<sup>a</sup> results for 73 SNPs passing the inclusion threshold for replication<sup>b</sup> and for which genotype data were available in the NHS control dataset. SNPs are sorted by chromosomal location. The rs12700667 SNP reaching genome-wide significance in the meta-analysis is highlighted in bold.

| SNP        | Chr | Location  | Gene <sup>c</sup> | GWA -All Endometriosis       |                        |                 | GWA – Stage B Endometriosis  |                        |                 | Replication – All Endometriosis |                        |                 | Meta-analysis          |                |
|------------|-----|-----------|-------------------|------------------------------|------------------------|-----------------|------------------------------|------------------------|-----------------|---------------------------------|------------------------|-----------------|------------------------|----------------|
|            |     |           |                   | RAF <sup>d</sup><br>(allele) | <i>P</i> -value        | OR<br>(95% CIs) | RAF <sup>d</sup><br>(allele) | <i>P</i> -value        | OR<br>(95% CIs) | RAF <sup>d</sup><br>(allele)    | <i>P</i> -value        | OR<br>(95% CIs) | <i>P</i> -value        | OR<br>(95% CI) |
|            |     |           |                   |                              |                        | 1.1             |                              |                        | 1.19            |                                 |                        | 1.08            |                        | 1.13           |
| rs7515106  | 1   | 22345997  | <i>WNT4</i>       | 0.22 (C)                     | 3.6 x 10 <sup>-5</sup> | (1.09-1.27)     | 0.22 (C)                     | 9.9 x 10 <sup>-4</sup> | (1.07-1.31)     | 0.23 (C)                        | 0.11                   | (0.98-1.19)     | 4.7 x 10 <sup>-5</sup> | (1.07-1.15)    |
| rs12742458 | 1   | 30349160  | Inter             | 0.30 (C)                     | 5.4 x 10 <sup>-5</sup> | (1.08-1.24)     | 0.30 (C)                     | 4.8 x 10 <sup>-4</sup> | (1.08-1.30)     | 0.29 (C)                        | 0.05                   | (0.84-1.00)     | 0.08                   | (0.99-1.15)    |
| rs12024204 | 1   | 80015589  | Inter             | 0.52 (G)                     | 3.8 x 10 <sup>-5</sup> | (1.07-1.22)     | 0.52 (G)                     | 3.9 x 10 <sup>-3</sup> | (1.04-1.24)     | 0.54 (G)                        | 4.6 x 10 <sup>-2</sup> | (1.00-1.17)     | 6.3 x 10 <sup>-6</sup> | (1.07-1.12)    |
| rs1218598  | 1   | 153062013 | <i>KCNN3</i>      | 0.23 (G)                     | 9.1 x 10 <sup>-5</sup> | (1.08-1.26)     | 0.23 (G)                     | 0.16                   | (0.98-1.21)     | 0.22 (G)                        | 0.88                   | (0.91-1.11)     | 1.3 x 10 <sup>-3</sup> | (1.04-1.11)    |
| rs4845396  | 1   | 153095033 | <i>KCNN3</i>      | 0.51 (G)                     | 6.5 x 10 <sup>-5</sup> | (1.07-1.22)     | 0.51 (G)                     | 0.26                   | (0.96-1.15)     | 0.51 (G)                        | 0.11                   | (0.98-1.16)     | 2.3 x 10 <sup>-5</sup> | (1.06-1.11)    |
| rs12125690 | 1   | 220077489 | Inter             | 0.21 (G)                     | 9.2 x 10 <sup>-4</sup> | (1.05-1.24)     | 0.21 (G)                     | 1.4 x 10 <sup>-5</sup> | (1.13-1.39)     | 0.21 (G)                        | 0.87                   | (0.89-1.10)     | 2.3 x 10 <sup>-2</sup> | (1.01-1.11)    |
| rs10910389 | 1   | 232430908 | Inter             | 0.09 (A)                     | 7.9 x 10 <sup>-4</sup> | (1.09-1.36)     | 0.09 (A)                     | 7.1 x 10 <sup>-5</sup> | (1.16-1.55)     | 0.09 (A)                        | 0.72                   | (0.85-1.12)     | 1.5 x 10 <sup>-2</sup> | (1.02-1.12)    |
| rs13407457 | 2   | 11572938  | Inter             | 0.15 (T)                     | 3.6 x 10 <sup>-5</sup> | (1.10-1.32)     | 0.15 (T)                     | 2.4 x 10 <sup>-6</sup> | (1.18-1.48)     | 0.15 (T)                        | 0.97                   | (0.89-1.12)     | 1.8 x 10 <sup>-3</sup> | (1.04-1.12)    |
| rs2373327  | 2   | 38075590  | <i>FAM82A1</i>    | 0.30 (G)                     | 2.4 x 10 <sup>-4</sup> | (1.06-1.22)     | 0.30 (G)                     | 8.4 x 10 <sup>-5</sup> | (1.10-1.32)     | 0.31 (G)                        | 0.39                   | (0.88-1.05)     | 2.2 x 10 <sup>-2</sup> | (1.01-1.12)    |
| rs7580660  | 2   | 41990292  | Inter             | 0.40 (C)                     | 9.6 x 10 <sup>-5</sup> | (1.07-1.22)     | 0.40 (C)                     | 2.8 x 10 <sup>-4</sup> | (1.08-1.28)     | 0.42 (C)                        | 0.72                   | (0.95-1.13)     | 1.7 x 10 <sup>-3</sup> | (1.03-1.12)    |
| rs2861638  | 2   | 67630022  | Inter             | 0.45 (A)                     | 4.5 x 10 <sup>-4</sup> | (1.05-1.20)     | 0.45 (A)                     | 2.4 x 10 <sup>-6</sup> | (1.13-1.34)     | 0.44 (A)                        | 0.54                   | (0.94-1.11)     | 1.4 x 10 <sup>-3</sup> | (1.03-1.12)    |
| rs9917294  | 2   | 82935950  | Inter             | 0.33 (A)                     | 8.2 x 10 <sup>-5</sup> | (1.07-1.23)     | 0.33 (A)                     | 1.3 x 10 <sup>-2</sup> | (1.02-1.23)     | 0.33 (A)                        | 0.71                   | (0.90-1.07)     | 8.3 x 10 <sup>-3</sup> | (1.02-1.12)    |
| rs16829241 | 2   | 134249092 | Inter             | 0.18 (A)                     | 8.3 x 10 <sup>-5</sup> | 1.18            | 0.18 (A)                     | 6.1 x 10 <sup>-3</sup> | 1.17            | 0.20 (A)                        | 0.35                   | 0.95            | 1.7 x 10 <sup>-2</sup> | 1.08           |



|            |   |           |               |          |                      |             |          |                      |             |          |                      |             |                      |          |
|------------|---|-----------|---------------|----------|----------------------|-------------|----------|----------------------|-------------|----------|----------------------|-------------|----------------------|----------|
|            |   |           |               |          |                      | (1.09-1.28) |          |                      | (1.04-1.30) |          |                      | (0.86-1.05) |                      | (1.01-1. |
|            |   |           |               |          |                      | 1.17        |          |                      | 1.30        |          |                      | 1.02        |                      | 1.11     |
| rs1250248  | 2 | 215995338 | <i>FN1</i>    | 0.27 (A) | $1.7 \times 10^{-5}$ | (1.09-1.26) | 0.27 (A) | $3.2 \times 10^{-8}$ | (1.19-1.43) | 0.28 (A) | 0.57                 | (0.94-1.12) | $1.6 \times 10^{-4}$ | (1.05-1. |
|            |   |           |               |          |                      | 1.15        |          |                      | 1.18        |          |                      | 0.96        |                      | 1.07     |
| rs4858692  | 3 | 25050171  | Inter         | 0.63 (T) | $2.7 \times 10^{-5}$ | (1.08-1.23) | 0.63 (T) | $2.4 \times 10^{-4}$ | (1.08-1.30) | 0.62 (T) | 0.35                 | (0.88-1.04) | $6.1 \times 10^{-3}$ | (1.02-1. |
|            |   |           |               |          |                      | 1.19        |          |                      | 1.10        |          |                      | 0.93        |                      | 1.07     |
| rs12636066 | 3 | 30888649  | <i>GADL1</i>  | 0.83 (C) | $8.6 \times 10^{-5}$ | (1.09-1.30) | 0.83 (C) | 0.11                 | (0.98-1.23) | 0.83 (C) | 0.26                 | (0.84-1.05) | $4.7 \times 10^{-2}$ | (1.00-1. |
|            |   |           |               |          |                      | 1.28        |          |                      | 1.30        |          |                      | 0.83        |                      | 1.08     |
| rs9860107  | 3 | 60015145  | <i>FHIT</i>   | 0.07 (G) | $5.7 \times 10^{-5}$ | (1.14-1.45) | 0.07 (G) | $1.3 \times 10^{-3}$ | (1.11-1.52) | 0.08 (G) | $2.4 \times 10^{-2}$ | (0.72-0.98) | 0.11                 | (0.98-1. |
|            |   |           |               |          |                      | 1.16        |          |                      | 1.14        |          |                      | 1.03        |                      | 1.10     |
| rs9865110  | 3 | 74064463  | Inter         | 0.38 (C) | $1.8 \times 10^{-5}$ | (1.08-1.24) | 0.38 (C) | $4.3 \times 10^{-3}$ | (1.04-1.24) | 0.40 (C) | 0.48                 | (0.95-1.12) | $2.7 \times 10^{-4}$ | (1.04-1. |
|            |   |           |               |          |                      | 1.24        |          |                      | 1.28        |          |                      | 0.93        |                      | 1.09     |
| rs7618969  | 3 | 75086179  | Inter         | 0.89 (G) | $8.6 \times 10^{-5}$ | (1.11-1.38) | 0.89 (G) | $9.2 \times 10^{-4}$ | (1.14-1.48) | 0.88 (G) | 0.31                 | (0.82-1.06) | $2.2 \times 10^{-2}$ | (1.01-1. |
|            |   |           |               |          |                      | 1.21        |          |                      | 1.18        |          |                      | 0.98        |                      | 1.12     |
| rs2053016  | 3 | 129127878 | <i>KLHDC6</i> | 0.16 (C) | $2.4 \times 10^{-5}$ | (1.10-1.32) | 0.16 (C) | $6.1 \times 10^{-3}$ | (1.05-1.32) | 0.16 (C) | 0.79                 | (0.88-1.10) | $1.1 \times 10^{-3}$ | (1.04-1. |
|            |   |           |               |          |                      | 1.30        |          |                      | 1.44        |          |                      | 0.92        |                      | 1.11     |
| rs9820182  | 3 | 135486035 | Inter         | 0.06 (G) | $1.1 \times 10^{-4}$ | (1.14-1.49) | 0.06 (G) | $2.5 \times 10^{-5}$ | (1.21-1.71) | 0.06 (G) | 0.32                 | (0.77-1.09) | $4.1 \times 10^{-2}$ | (1.00-1. |
|            |   |           |               |          |                      | 1.15        |          |                      | 1.13        |          |                      | 1.02        |                      | 1.09     |
| rs10008492 | 4 | 38442115  | Inter         | 0.33 (T) | $7.1 \times 10^{-5}$ | (1.07-1.23) | 0.33 (T) | $7.3 \times 10^{-3}$ | (1.03-1.24) | 0.37 (T) | 0.71                 | (0.93-1.10) | $8.4 \times 10^{-4}$ | (1.04-1. |
|            |   |           |               |          |                      | 1.14        |          |                      | 1.16        |          |                      | 1.07        |                      | 1.11     |
| rs1402142  | 4 | 64653543  | Inter         | 0.53 (C) | $8.0 \times 10^{-5}$ | (1.07-1.22) | 0.53 (C) | $8.0 \times 10^{-4}$ | (1.06-1.26) | 0.56 (C) | 0.08                 | (0.99-1.16) | $2.4 \times 10^{-5}$ | (1.05-1. |
|            |   |           |               |          |                      | 1.15        |          |                      | 1.09        |          |                      | 1.02        |                      | 1.09     |
| -rs1392764 | 4 | 117980897 | Inter         | 0.45 (G) | $2.9 \times 10^{-5}$ | (1.08-1.23) | 0.45 (G) | $4.9 \times 10^{-2}$ | (1.00-1.19) | 0.45 (G) | 0.57                 | (0.94-1.11) | $3.4 \times 10^{-4}$ | (1.04-1. |
|            |   |           |               |          |                      | 1.31        |          |                      | 1.30        |          |                      | 1.07        |                      | 1.19     |
| rs17014446 | 4 | 130347853 | Inter         | 0.06 (T) | $7.0 \times 10^{-5}$ | (1.15-1.49) | 0.06 (T) | $2.9 \times 10^{-3}$ | (1.09-1.55) | 0.07 (T) | 0.37                 | (0.92-1.27) | $6.1 \times 10^{-4}$ | (1.08-1. |
|            |   |           |               |          |                      | 1.17        |          |                      | 1.20        |          |                      | 1.04        |                      | 1.11     |
| rs2066865  | 4 | 155744726 | <i>FGG</i>    | 0.77 (G) | $7.0 \times 10^{-5}$ | (1.08-1.26) | 0.77 (G) | $5.8 \times 10^{-4}$ | (1.08-1.33) | 0.78 (G) | 0.38                 | (0.95-1.14) | $3.1 \times 10^{-4}$ | (1.05-1. |
|            |   |           |               |          |                      | 1.63        |          |                      | 1.78        |          |                      | 1.25        |                      | 1.42     |
| rs2010146  | 4 | 168154501 | <i>SPOCK3</i> | 0.02 (T) | $4.3 \times 10^{-5}$ | (1.28-2.06) | 0.02 (T) | $8.4 \times 10^{-5}$ | (1.32-2.39) | 0.02 (T) | 0.15                 | (0.92-1.71) | $1.6 \times 10^{-3}$ | (1.18-1. |
|            |   |           |               |          |                      | 1.15        |          |                      | 1.09        |          |                      | 0.93        |                      | 1.04     |
| rs268979   | 5 | 22682205  | <i>CDH12</i>  | 0.70 (A) | $6.7 \times 10^{-5}$ | (1.07-1.24) | 0.70 (A) | $5.7 \times 10^{-2}$ | (1.00-1.20) | 0.69 (A) | 0.09                 | (0.85-1.01) | 0.11                 | (0.99-1. |
| rs2619939  | 5 | 25837347  | Inter         | 0.12 (T) | $2.7 \times 10^{-5}$ | 1.23        | 0.12 (T) | $3.0 \times 10^{-3}$ | 1.22        | 0.12 (T) | 0.43                 | 1.05        | $1.4 \times 10^{-4}$ | 1.16     |

|                   |          |                 |                   |                 |                                        |                    |                 |                                        |                                |                 |                                        |                    |                                        |                  |
|-------------------|----------|-----------------|-------------------|-----------------|----------------------------------------|--------------------|-----------------|----------------------------------------|--------------------------------|-----------------|----------------------------------------|--------------------|----------------------------------------|------------------|
|                   |          |                 |                   |                 |                                        | (1.12-1.36)        |                 |                                        | (1.07-1.39)                    |                 |                                        | (0.93-1.18)        |                                        | (1.07-1.         |
|                   |          |                 |                   |                 |                                        | 1.14               |                 |                                        | 1.10                           |                 |                                        | 0.99               |                                        | 1.07             |
| rs855367          | 6        | 9943180         | <i>OFCC1</i>      | 0.61 (C)        | $6.9 \times 10^{-5}$                   | (1.07-1.22)        | 0.61 (C)        | $3.3 \times 10^{-2}$                   | (1.00-1.20)                    | 0.61 (C)        | 0.91                                   | (0.91-1.08)        | $4.0 \times 10^{-3}$                   | (1.02-1.         |
|                   |          |                 |                   |                 |                                        | 1.14               |                 |                                        | 1.21                           |                 |                                        | 1.01               |                                        | 1.09             |
| rs7739264         | 6        | 19893567        | Inter             | 0.52 (T)        | $4.5 \times 10^{-5}$                   | (1.07-1.22)        | 0.52 (T)        | $1.6 \times 10^{-5}$                   | (1.11-1.32)                    | 0.53 (T)        | 0.76                                   | (0.93-1.10)        | $6.5 \times 10^{-4}$                   | (1.03-1.         |
|                   |          |                 |                   |                 |                                        | 1.45               |                 |                                        | 1.51                           |                 |                                        | 1.05               |                                        | 1.26             |
| rs17644393        | 6        | 34715936        | <i>C6orf106</i>   | 0.96 (G)        | $6.5 \times 10^{-5}$                   | (1.20-1.74)        | 0.96 (G)        | $1.3 \times 10^{-3}$                   | (1.17-1.95)                    | 0.96 (G)        | 0.62                                   | (0.85-1.31)        | $9.9 \times 10^{-4}$                   | (1.10-1.         |
|                   |          |                 |                   |                 |                                        | 1.15               |                 |                                        | 1.15                           |                 |                                        | 1.06               |                                        | 1.12             |
| rs9349553         | 6        | 50823366        | <i>TFAP2D</i>     | 0.29 (C)        | $7.6 \times 10^{-5}$                   | (1.07-1.24)        | 0.29 (C)        | $4.1 \times 10^{-3}$                   | (1.04-1.26)                    | 0.31 (C)        | 0.23                                   | (0.97-1.15)        | $6.44 \times 10^{-5}$                  | (1.06-1.         |
|                   |          |                 |                   |                 |                                        | 1.18               |                 |                                        | 1.12                           |                 |                                        | 0.97               |                                        | 1.08             |
| rs1741916         | 6        | 57297595        | <i>PRIM2</i>      | 0.74 (G)        | $2.0 \times 10^{-5}$                   | (1.09-1.27)        | 0.74 (G)        | $2.2 \times 10^{-2}$                   | (1.02-1.24)                    | 0.74 (G)        | 0.47                                   | (0.88-1.06)        | $5.6 \times 10^{-3}$                   | (1.02-1.         |
|                   |          |                 |                   |                 |                                        | 1.20               |                 |                                        | 1.25                           |                 |                                        | 1.10               |                                        | 1.15             |
| rs12110479        | 6        | 152596089       | <i>SYNE1</i>      | 0.19 (T)        | $1.2 \times 10^{-5}$                   | (1.10-1.30)        | 0.19 (T)        | $2.7 \times 10^{-5}$                   | (1.13-1.40)                    | 0.21 (T)        | 0.07                                   | (0.99-1.21)        | $9.9 \times 10^{-6}$                   | (1.08-1.         |
|                   |          |                 |                   |                 |                                        | 1.17               |                 |                                        | 1.19                           |                 |                                        | 1.03               |                                        | 1.12             |
| rs1890100         | 6        | 152679902       | <i>SYNE1</i>      | 0.30 (A)        | $1.6 \times 10^{-5}$                   | (1.09-1.25)        | 0.30 (A)        | $2.5 \times 10^{-4}$                   | (1.08-1.30)                    | 0.31 (A)        | 0.47                                   | (0.94-1.13)        | $4.2 \times 10^{-5}$                   | (1.06-1.         |
|                   |          |                 |                   |                 |                                        | 1.18               |                 |                                        | 1.34                           |                 |                                        | 1.17               |                                        | 1.18             |
| rs7798431         | 7        | 25827337        | Inter             | 0.77 (G)        | $1.9 \times 10^{-5}$                   | (1.09-1.28)        | 0.77 (G)        | $6.0 \times 10^{-8}$                   | (1.21-1.49)                    | 0.75 (G)        | $1.6 \times 10^{-3}$                   | (1.06-1.28)        | $1.1 \times 10^{-7}$                   | (1.11-1.:        |
|                   |          |                 |                   |                 |                                        | <b>1.22</b>        |                 |                                        | <b>1.38</b>                    |                 |                                        | <b>1.17</b>        |                                        | <b>1.20</b>      |
| <b>rs12700667</b> | <b>7</b> | <b>25868163</b> | <b>Inter</b>      | <b>0.76 (A)</b> | <b><math>2.6 \times 10^{-7}</math></b> | <b>(1.13-1.32)</b> | <b>0.76 (A)</b> | <b><math>1.5 \times 10^{-9}</math></b> | <b>(1.24-1.53)<sup>f</sup></b> | <b>0.74 (A)</b> | <b><math>1.2 \times 10^{-3}</math></b> | <b>(1.06-1.28)</b> | <b><math>1.4 \times 10^{-9}</math></b> | <b>(1.13-1.:</b> |
|                   |          |                 |                   |                 |                                        | 1.24               |                 |                                        | 1.20                           |                 |                                        | 1.00               |                                        | 1.14             |
| rs4719955         | 7        | 28851437        | Inter             | 0.88 (T)        | $5.5 \times 10^{-5}$                   | (1.11-1.37)        | 0.88 (T)        | $9.0 \times 10^{-3}$                   | (1.05-1.38)                    | 0.88 (T)        | 0.94                                   | (0.88-1.14)        | $1.0 \times 10^{-3}$                   | (1.05-1.         |
|                   |          |                 |                   |                 |                                        | 1.17               |                 |                                        | 1.14                           |                 |                                        | 1.03               |                                        | 1.11             |
| rs10953541        | 7        | 107031781       | Inter             | 0.75 (C)        | $3.2 \times 10^{-5}$                   | (1.09-1.27)        | 0.75 (C)        | $9.1 \times 10^{-3}$                   | (1.03-1.26)                    | 0.75 (C)        | 0.53                                   | (0.93-1.13)        | $5.4 \times 10^{-4}$                   | (1.04-1.         |
|                   |          |                 |                   |                 |                                        | 1.17               |                 |                                        | 1.17                           |                 |                                        | 1.04               |                                        | 1.11             |
| rs1544832         | 7        | 132002029       | <i>AC009365.1</i> | 0.35 (T)        | $1.0 \times 10^{-5}$                   | (1.09-1.25)        | 0.35 (T)        | $5.6 \times 10^{-4}$                   | (1.07-1.28)                    | 0.35 (T)        | 0.32                                   | (0.96-1.14)        | $5.5 \times 10^{-5}$                   | (1.06-1.         |
|                   |          |                 |                   |                 |                                        | 1.14               |                 |                                        | 1.14                           |                 |                                        | 1.06               |                                        | 1.10             |
| rs7809057         | 7        | 134258216       | <i>CALD1</i>      | 0.53 (A)        | $4.3 \times 10^{-5}$                   | (1.07-1.22)        | 0.53 (A)        | $2.9 \times 10^{-3}$                   | (1.05-1.24)                    | 0.55 (A)        | 0.18                                   | (0.97-1.15)        | $1.7 \times 10^{-4}$                   | (1.05-1.         |
|                   |          |                 |                   |                 |                                        | 1.16               |                 |                                        | 1.14                           |                 |                                        | 1.14               |                                        | 1.15             |
| rs2738113         | 8        | 6816495         | Inter             | 0.44 (G)        | $6.3 \times 10^{-6}$                   | (1.09-1.24)        | 0.44 (G)        | $2.9 \times 10^{-3}$                   | (1.05-1.25)                    | 0.45 (G)        | $1.3 \times 10^{-2}$                   | (1.03-1.26)        | $2.8 \times 10^{-7}$                   | (1.09-1.         |
|                   |          |                 |                   |                 |                                        | 1.17               |                 |                                        | 1.12                           |                 |                                        | 1.04               |                                        | 1.12             |
| rs13268432        | 8        | 8544244         | Inter             | 0.77 (C)        | $6.3 \times 10^{-5}$                   | (1.09-1.27)        | 0.77 (C)        | $3.0 \times 10^{-2}$                   | (1.01-1.25)                    | 0.78 (C)        | 0.43                                   | (0.94-1.15)        | $2.6 \times 10^{-4}$                   | (1.05-1.         |
| rs2593353         | 9        | 17494609        | <i>CNTLN</i>      | 0.63 (G)        | $2.1 \times 10^{-4}$                   | 1.14               | 0.63 (G)        | $1.2 \times 10^{-5}$                   | 1.22                           | 0.62 (G)        | 0.23                                   | 1.05               | $2.6 \times 10^{-4}$                   | 1.10             |

|            |    |           |               |          |                      |             |          |                      |             |          |      |             |                       |          |
|------------|----|-----------|---------------|----------|----------------------|-------------|----------|----------------------|-------------|----------|------|-------------|-----------------------|----------|
|            |    |           |               |          |                      | (1.06-1.21) |          |                      | (1.12-1.34) |          |      | (0.97-1.14) |                       | (1.04-1. |
|            |    |           |               |          |                      | 1.14        |          |                      | 1.21        |          |      | 1.01        |                       | 1.09     |
| rs2015920  | 10 | 30977962  | Inter         | 0.27 (G) | $5.5 \times 10^{-4}$ | (1.06-1.22) | 0.27 (G) | $9.8 \times 10^{-5}$ | (1.10-1.33) | 0.27 (G) | 0.77 | (0.93-1.11) | $3.2 \times 10^{-3}$  | (1.03-1. |
|            |    |           |               |          |                      | 1.15        |          |                      | 1.17        |          |      | 1.06        |                       | 1.11     |
| rs7896859  | 10 | 101653428 | <i>DNMBP</i>  | 0.58 (G) | $2.2 \times 10^{-5}$ | (1.08-1.23) | 0.58 (G) | $6.1 \times 10^{-4}$ | (1.07-1.27) | 0.60 (G) | 0.17 | (0.97-1.15) | $5.3 \times 10^{-5}$  | (1.05-1. |
|            |    |           |               |          |                      | 1.17        |          |                      | 1.20        |          |      | 0.93        |                       | 1.07     |
| rs1572396  | 10 | 117315011 | <i>ATRNL1</i> | 0.71 (C) | $1.4 \times 10^{-5}$ | (1.09-1.26) | 0.71 (C) | $2.1 \times 10^{-4}$ | (1.09-1.32) | 0.71 (C) | 0.14 | (0.85-1.02) | $1.5 \times 10^{-2}$  | (1.01-1. |
|            |    |           |               |          |                      | 1.17        |          |                      | 1.17        |          |      | 0.97        |                       | 1.08     |
| rs2218868  | 11 | 57682553  | <i>OR9Q1</i>  | 0.42 (C) | $1.9 \times 10^{-6}$ | (1.10-1.25) | 0.42 (C) | $3.1 \times 10^{-4}$ | (1.08-1.28) | 0.44 (C) | 0.43 | (0.89-1.05) | $1.8 \times 10^{-3}$  | (1.03-1. |
|            |    |           |               |          |                      | 1.12        |          |                      | 1.19        |          |      | 1.03        |                       | 1.05     |
| rs4073612  | 11 | 93505299  | <i>PANX1</i>  | 0.51 (G) | $8.3 \times 10^{-4}$ | (1.05-1.19) | 0.51 (G) | $7.1 \times 10^{-5}$ | (1.09-1.30) | 0.50 (G) | 0.47 | (0.95-1.12) | $3.3 \times 10^{-2}$  | (1.00-1. |
|            |    |           |               |          |                      | 1.15        |          |                      | 1.14        |          |      | 0.98        |                       | 1.09     |
| rs635984   | 11 | 100428376 | <i>PGR</i>    | 0.49 (C) | $3.2 \times 10^{-5}$ | (1.07-1.22) | 0.49 (C) | $3.9 \times 10^{-3}$ | (1.04-1.24) | 0.50 (C) | 0.61 | (0.90-1.06) | $9.9 \times 10^{-4}$  | (1.03-1. |
|            |    |           |               |          |                      | 1.24        |          |                      | 1.25        |          |      | 1.07        |                       | 1.15     |
| rs962656   | 12 | 25095620  | <i>LRMP</i>   | 0.11 (C) | $4.9 \times 10^{-5}$ | (1.12-1.37) | 0.11 (C) | $9.2 \times 10^{-4}$ | (1.10-1.43) | 0.13 (C) | 0.27 | (0.95-1.21) | $2.7 \times 10^{-4}$  | (1.07-1. |
|            |    |           |               |          |                      | 1.20        |          |                      | 1.16        |          |      | 0.99        |                       | 1.10     |
| rs1163039  | 12 | 79555672  | Inter         | 0.17 (C) | $2.2 \times 10^{-5}$ | (1.10-1.31) | 0.17 (C) | $8.7 \times 10^{-3}$ | (1.04-1.30) | 0.17 (C) | 0.85 | (0.95-1.21) | $4.2 \times 10^{-3}$  | (1.03-1. |
|            |    |           |               |          |                      | 1.18        |          |                      | 1.20        |          |      | 1.01        |                       | 1.11     |
| rs10859871 | 12 | 94236007  | Inter         | 0.31 (C) | $2.9 \times 10^{-6}$ | (1.10-1.27) | 0.31 (C) | $1.3 \times 10^{-4}$ | (1.09-1.31) | 0.32 (C) | 0.78 | (0.93-1.10) | $1.9 \times 10^{-4}$  | (1.05-1. |
|            |    |           |               |          |                      | 1.20        |          |                      | 1.07        |          |      | 1.09        |                       | 1.15     |
| rs3015404  | 13 | 104643603 | Inter         | 0.15 (T) | $7.8 \times 10^{-5}$ | (1.10-1.31) | 0.15 (T) | 0.29                 | (0.95-1.21) | 0.16 (T) | 0.13 | (0.97-1.22) | $9.56 \times 10^{-5}$ | (1.07-1. |
|            |    |           |               |          |                      | 1.16        |          |                      | 1.12        |          |      | 1.02        |                       | 1.09     |
| rs9559922  | 13 | 110435375 | Inter         | 0.70 (C) | $5.4 \times 10^{-5}$ | (1.08-1.24) | 0.70 (C) | $2.4 \times 10^{-2}$ | (1.01-1.23) | 0.72 (C) | 0.72 | (0.93-1.11) | $9.8 \times 10^{-4}$  | (1.04-1. |
|            |    |           |               |          |                      | 1.16        |          |                      | 1.15        |          |      | 0.97        |                       | 1.08     |
| rs7158744  | 14 | 23787631  | <i>TGM1</i>   | 0.65 (T) | $2.0 \times 10^{-5}$ | (1.08-1.24) | 0.65 (T) | $2.8 \times 10^{-3}$ | (1.05-1.26) | 0.66 (T) | 0.54 | (0.89-1.06) | $2.0 \times 10^{-3}$  | (1.03-1. |
|            |    |           |               |          |                      | 1.16        |          |                      | 1.22        |          |      | 1.00        |                       | 1.08     |
| rs4900756  | 14 | 46948718  | <i>MDGA2</i>  | 0.27 (C) | $8.5 \times 10^{-5}$ | (1.07-1.24) | 0.27 (C) | $3.7 \times 10^{-5}$ | (1.11-1.34) | 0.28 (C) | 0.98 | (0.91-1.10) | $5.8 \times 10^{-3}$  | (1.02-1. |
|            |    |           |               |          |                      | 1.24        |          |                      | 1.42        |          |      | 1.00        |                       | 1.14     |
| rs1951297  | 14 | 95503995  | Inter         | 0.07 (A) | $5.1 \times 10^{-4}$ | (1.10-1.41) | 0.07 (A) | $1.0 \times 10^{-5}$ | (1.22-1.66) | 0.08 (A) | 0.99 | (0.86-1.17) | $7.6 \times 10^{-3}$  | (1.03-1. |
|            |    |           |               |          |                      | 1.14        |          |                      | 1.23        |          |      | 0.95        |                       | 1.05     |
| rs936532   | 15 | 37585407  | Inter         | 0.29 (A) | $4.4 \times 10^{-4}$ | (1.06-1.22) | 0.29 (A) | $1.1 \times 10^{-5}$ | (1.12-1.35) | 0.30 (A) | 0.28 | (0.87-1.04) | 0.08                  | (0.99-1. |
| rs6496857  | 15 | 90050851  | Inter         | 0.88 (T) | $6.1 \times 10^{-6}$ | 1.26        | 0.88 (T) | $4.8 \times 10^{-5}$ | 1.33        | 0.88 (T) | 0.34 | 0.94        | $4.3 \times 10^{-3}$  | 1.12     |

|            |    |           |        |          |                      |             |          |                      |             |          |                      |             |                      |          |
|------------|----|-----------|--------|----------|----------------------|-------------|----------|----------------------|-------------|----------|----------------------|-------------|----------------------|----------|
|            |    |           |        |          |                      | (1.14-1.40) |          |                      | (1.16-1.53) |          |                      | (0.83-1.07) |                      | (1.03-1. |
|            |    |           |        |          |                      | 1.28        |          |                      | 1.47        |          |                      | 0.91        |                      | 1.11     |
| rs709423   | 16 | 12212119  | SNX29  | 0.07 (T) | $1.1 \times 10^{-4}$ | (1.13-1.45) | 0.07 (T) | $1.5 \times 10^{-6}$ | (1.25-1.71) | 0.07 (T) | 0.22                 | (0.78-1.06) | $2.8 \times 10^{-2}$ | (1.01-1. |
|            |    |           |        |          |                      | 1.17        |          |                      | 1.31        |          |                      | 0.98        |                      | 1.09     |
| rs1990629  | 16 | 48275072  | ZNF423 | 0.14 (G) | $9.0 \times 10^{-4}$ | (1.07-1.29) | 0.14 (G) | $7.7 \times 10^{-6}$ | (1.16-1.48) | 0.13 (G) | 0.79                 | (0.87-1.11) | $1.8 \times 10^{-2}$ | (1.01-1. |
|            |    |           |        |          |                      | 1.17        |          |                      | 1.21        |          |                      | 0.97        |                      | 1.09     |
| rs2107654  | 17 | 61063535  | CCDC46 | 0.47 (C) | $1.8 \times 10^{-6}$ | (1.10-1.25) | 0.47 (C) | $1.9 \times 10^{-5}$ | (1.11-1.32) | 0.47 (C) | 0.53                 | (0.90-1.06) | $9.9 \times 10^{-4}$ | (1.03-1. |
|            |    |           |        |          |                      | 1.18        |          |                      | 1.22        |          |                      | 0.98        |                      | 1.09     |
| rs1790644  | 18 | 32300382  | FHOD3  | 0.28 (A) | $4.1 \times 10^{-6}$ | (1.10-1.27) | 0.28 (A) | $3.0 \times 10^{-5}$ | (1.11-1.35) | 0.28 (A) | 0.75                 | (0.90-1.08) | $1.4 \times 10^{-3}$ | (1.03-1. |
|            |    |           |        |          |                      | 1.20        |          |                      | 1.39        |          |                      | 0.86        |                      | 1.04     |
| rs6507701  | 18 | 42216915  | RNF165 | 0.89 (C) | $8.6 \times 10^{-4}$ | (1.08-1.34) | 0.89 (C) | $2.1 \times 10^{-5}$ | (1.20-1.62) | 0.88 (C) | $2.5 \times 10^{-2}$ | (0.75-0.98) | 0.30                 | (0.96-1. |
|            |    |           |        |          |                      | 1.19        |          |                      | 1.30        |          |                      | 1.04        |                      | 1.12     |
| rs12455952 | 18 | 56991498  | Inter  | 0.19 (G) | $2.0 \times 10^{-5}$ | (1.10-1.29) | 0.19 (G) | $1.3 \times 10^{-6}$ | (1.17-1.44) | 0.20 (G) | 0.24                 | (0.93-1.15) | $1.7 \times 10^{-4}$ | (1.06-1. |
|            |    |           |        |          |                      | 1.17        |          |                      | 1.13        |          |                      | 1.02        |                      | 1.10     |
| rs6567322  | 18 | 58886429  | Inter  | 0.22 (G) | $8.8 \times 10^{-5}$ | (1.08-1.26) | 0.22 (G) | $2.1 \times 10^{-2}$ | (1.02-1.25) | 0.24 (G) | 0.72                 | (0.92-1.12) | $1.5 \times 10^{-3}$ | (1.04-1. |
|            |    |           |        |          |                      | 1.15        |          |                      | 1.16        |          |                      | 1.00        |                      | 1.08     |
| rs12052035 | 18 | 60569964  | Inter  | 0.53 (C) | $2.1 \times 10^{-5}$ | (1.08-1.23) | 0.53 (C) | $9.7 \times 10^{-4}$ | (1.06-1.26) | 0.54 (C) | 0.92                 | (0.92-1.08) | $1.3 \times 10^{-3}$ | (1.03-1. |
|            |    |           |        |          |                      | 1.18        |          |                      | 1.25        |          |                      | 1.04        |                      | 1.12     |
| rs12955300 | 18 | 74516951  | Inter  | 0.75 (C) | $1.6 \times 10^{-5}$ | (1.10-1.28) | 0.75 (C) | $2.8 \times 10^{-5}$ | (1.13-1.39) | 0.76 (C) | 0.39                 | (0.95-1.14) | $7.4 \times 10^{-5}$ | (1.06-1. |
|            |    |           |        |          |                      | 1.15        |          |                      | 1.18        |          |                      | 1.03        |                      | 1.12     |
| rs12463130 | 19 | 34803496  | Inter  | 0.43 (T) | $2.6 \times 10^{-5}$ | (1.08-1.23) | 0.43 (T) | $2.2 \times 10^{-4}$ | (1.08-1.29) | 0.43 (T) | 0.41                 | (0.95-1.14) | $7.8 \times 10^{-5}$ | (1.06-1. |
|            |    |           |        |          |                      | 1.38        |          |                      | 1.40        |          |                      | 1.02        |                      | 1.23     |
| rs6133922  | 20 | 10349073  | MKKS   | 0.06 (G) | $4.4 \times 10^{-6}$ | (1.20-1.58) | 0.06 (G) | $1.8 \times 10^{-4}$ | (1.18-1.68) | 0.06 (G) | 0.79                 | (0.85-1.22) | $1.0 \times 10^{-4}$ | (1.11-1. |
|            |    |           |        |          |                      | 1.22        |          |                      | 1.19        |          |                      | 1.06        |                      | 1.17     |
| rs17653586 | X  | 154568340 | SPRY3  | 0.83 (G) | $1.4 \times 10^{-5}$ | (1.11-1.33) | 0.83 (G) | $4.5 \times 10^{-3}$ | (1.06-1.34) | 0.85 (G) | 0.42                 | (0.92-1.22) | $3.0 \times 10^{-3}$ | (1.05-1. |

<sup>a</sup>Meta-analysis included "all" endometriosis QIMR and Oxford endometriosis cases and all NHSII (replication) cases.

<sup>b</sup> SNPs were included for replication in the NHS cohort if they reached the following thresholds: (1)  $P < 1.0 \times 10^{-4}$  in the association analysis with all QIMR and Oxford endometriosis cases, or (2) any SNPs not already included with a  $P < 1.0 \times 10^{-4}$  in the association analysis including only Stage B cases and  $P < 1.0 \times 10^{-3}$  in the total endometriosis analysis.

<sup>c</sup> Gene name is provided if the genotyped SNP is located in upstream, 3'UTR, intronic, exonic, 5'UTR, or downstream regions of that gene as annotated by Ensembl Genome Browser GRCh37 (Feb 2009). *Inter* denotes a SNP is located in an intergenic region.

<sup>d</sup> RAF= Risk allele frequency for the total case and control cohorts.

<sup>e</sup> Combined results for the QIMR/Oxford stage B data with the replication data for rs12700667 and rs7798431 were  $P = 7.6 \times 10^{-11}$ ; OR = 1.26 (1.17-1.35) and  $P = 1.8 \times 10^{-9}$ ; OR = 1.24 (1.16-1.33), respectively].

<sup>f</sup> Analysis including only stage A cases:  $P = 0.02$ , OR = 1.12 (1.02-1.24)

**Supplementary Table 4** Japanese<sup>26</sup>, QIMR plus Oxford “all” endometriosis and meta-analysis results for 93 of the top 100 SNPs in Uno *et al.*<sup>26</sup> for which we had genotype data passing QC. SNPs with nominal evidence for replication ( $P \leq 0.05$  and effect in the same direction) in the QIMR and Oxford data are highlighted in bold.

| Uno <i>et al.</i> <sup>26</sup> GWA <sup>a</sup> |          |                   |                        |                              |                         |                   | QIMR+OX GWA            |                              |                         | GWAMA meta-analysis of Uno <i>et al.</i> <sup>26</sup> and QIMR+OX |                              |                         |                                   |           |
|--------------------------------------------------|----------|-------------------|------------------------|------------------------------|-------------------------|-------------------|------------------------|------------------------------|-------------------------|--------------------------------------------------------------------|------------------------------|-------------------------|-----------------------------------|-----------|
| No.                                              | Chr      | SNP               | Ref/Other <sup>b</sup> | <i>P</i>                     | OR (95% CIs)            | Gene <sup>c</sup> | Ref/Other <sup>b</sup> | <i>P</i>                     | OR (95% CIs)            | Ref/Other <sup>b</sup>                                             | <i>P</i>                     | OR (95% CIs)            | q statistic <i>P</i> <sup>d</sup> | EI        |
| 1                                                | 1        | rs7550872         | T/C                    | 2.7 x 10 <sup>-6</sup>       | 1.37 (1.21-1.56)        | Inter             | T/C                    | 4.9 x 10 <sup>-1</sup>       | 0.97 (0.87-1.07)        | T/C                                                                | 1.0 x 10 <sup>-2</sup>       | 1.11 (1.02-1.20)        | 1.6 x 10 <sup>-5</sup>            | +-        |
| 2                                                | 14       | rs12888049        | G/A                    | 2.7 x 10 <sup>-6</sup>       | 1.36 (1.19-1.54)        | <i>TCRA</i>       | G/A                    | 7.6 x 10 <sup>-1</sup>       | 1.01 (0.94-1.09)        | G/A                                                                | 1.2 x 10 <sup>-2</sup>       | 1.09 (1.02-1.17)        | 1.7 x 10 <sup>-4</sup>            | +-        |
| 3                                                | 1        | rs12568930        | T/C                    | 2.8 x 10 <sup>-6</sup>       | 1.37 (1.20-1.55)        | Inter             | T/C                    | 1.4 x 10 <sup>-1</sup>       | 0.94 (0.86-1.02)        | T/C                                                                | 1.9 x 10 <sup>-1</sup>       | 1.05 (0.98-1.13)        | 2.5 x 10 <sup>-6</sup>            | +-        |
| 4                                                | 1        | rs7542242         | T/C                    | 2.9 x 10 <sup>-6</sup>       | 1.36 (1.20-1.54)        | Inter             | C/T                    | 8.5 x 10 <sup>-2</sup>       | 0.94 (0.88-1.01)        | T/C                                                                | 1.2 x 10 <sup>-4</sup>       | 1.13 (1.06-1.20)        | 7.8 x 10 <sup>-4</sup>            | +-        |
| 5                                                | 1        | rs6696981         | A/G                    | 3.7 x 10 <sup>-6</sup>       | 1.37 (1.20-1.56)        | Inter             | G/T                    | 5.0 x 10 <sup>-1</sup>       | 0.97 (0.87-1.07)        | A/G                                                                | 3.2 x 10 <sup>-6</sup>       | 1.37 (1.20-1.56)        | 1.00                              | +'        |
| 6                                                | 1        | rs7524102         | A/G                    | 3.8 x 10 <sup>-6</sup>       | 1.36 (1.20-1.54)        | Inter             | A/G                    | 1.2 x 10 <sup>-1</sup>       | 0.93 (0.86-1.02)        | A/G                                                                | 1.5 x 10 <sup>-1</sup>       | 1.05 (0.98-1.13)        | 1.2 x 10 <sup>-6</sup>            | +-        |
| 7                                                | 1        | rs12723796        | A/G                    | 9.0 x 10 <sup>-6</sup>       | 1.36 (1.19-1.55)        | Inter             | G/A                    | 4.5 x 10 <sup>-1</sup>       | 0.96 (0.87-1.06)        | A/G                                                                | 9.4 x 10 <sup>-4</sup>       | 1.14 (1.06-1.24)        | 1.5 x 10 <sup>-3</sup>            | +-        |
| 8                                                | 15       | rs685850          | G/A                    | 9.6 x 10 <sup>-6</sup>       | 1.47 (1.24-1.74)        | Inter             | G/A                    | 6.7 x 10 <sup>-1</sup>       | 1.01 (0.95-1.08)        | G/A                                                                | 4.8 x 10 <sup>-2</sup>       | 1.06 (1.00-1.13)        | 6.4 x 10 <sup>-5</sup>            | +-        |
| 9                                                | 6        | rs12525163        | C/T                    | 9.8 x 10 <sup>-6</sup>       | 1.38 (1.20-1.60)        | <i>ESR1</i>       | T/C                    | 5.1 x 10 <sup>-2</sup>       | 1.08 (1.00-1.16)        | C/T                                                                | 7.3 x 10 <sup>-1</sup>       | 1.01 (0.95-1.08)        | 9.1 x 10 <sup>-7</sup>            | +-        |
| 10                                               | 20       | rs11698045        | T/C                    | 1.5 x 10 <sup>-5</sup>       | 1.37 (1.19-1.59)        | Inter             | C/T                    | 3.7 x 10 <sup>-1</sup>       | 0.97 (0.91-1.04)        | T/C                                                                | 8.2 x 10 <sup>-3</sup>       | 1.08 (1.02-1.15)        | 3.1 x 10 <sup>-4</sup>            | +-        |
| 11                                               | 15       | rs735980          | A/G                    | 1.7 x 10 <sup>-5</sup>       | 1.27 (1.14-1.41)        | <i>CCDC33</i>     | G/A                    | 1.2 x 10 <sup>-1</sup>       | 0.93 (0.86-1.02)        | A/G                                                                | 9.6 x 10 <sup>-5</sup>       | 1.14 (1.07-1.22)        | 1.4 x 10 <sup>-2</sup>            | +-        |
| 12                                               | 1        | rs2501279         | T/C                    | 1.9 x 10 <sup>-5</sup>       | 1.30 (1.15-1.46)        | Inter             | T/C                    | 1.5 x 10 <sup>-1</sup>       | 1.05 (0.98-1.12)        | T/C                                                                | 1.2 x 10 <sup>-3</sup>       | 1.10 (1.04-1.17)        | 2.5 x 10 <sup>-3</sup>            | +-        |
| 13                                               | 20       | rs4396776         | A/C                    | 2.0 x 10 <sup>-5</sup>       | 1.26 (1.13-1.41)        | Inter             | C/A                    | 6.9 x 10 <sup>-1</sup>       | 0.99 (0.92-1.05)        | A/C                                                                | 1.3 x 10 <sup>-2</sup>       | 1.07 (1.01-1.14)        | 7.7 x 10 <sup>-4</sup>            | +-        |
| 14                                               | 6        | rs1159327         | C/T                    | 2.0 x 10 <sup>-5</sup>       | 1.34 (1.17-1.53)        | <i>ESR1</i>       | C/T                    | 7.9 x 10 <sup>-2</sup>       | 1.07 (0.99-1.15)        | C/T                                                                | 4.0 x 10 <sup>-4</sup>       | 1.12 (1.05-1.20)        | 3.6 x 10 <sup>-3</sup>            | +-        |
| 15                                               | 12       | rs10771314        | A/G                    | 2.3 x 10 <sup>-5</sup>       | 1.48 (1.23-1.77)        | <i>TM7SF3</i>     | G/A                    | 6.1 x 10 <sup>-1</sup>       | 1.03 (0.92-1.15)        | A/G                                                                | 1.0 x 10 <sup>-1</sup>       | 1.08 (0.98-1.19)        | 1.2 x 10 <sup>-4</sup>            | +-        |
| <b>16</b>                                        | <b>7</b> | <b>rs993183</b>   | <b>G/A</b>             | <b>2.3 x 10<sup>-5</sup></b> | <b>1.26 (1.13-1.40)</b> | <b>Inter</b>      | <b>G/A</b>             | <b>2.5 x 10<sup>-2</sup></b> | <b>1.08 (1.01-1.15)</b> | <b>G/A</b>                                                         | <b>5.2 x 10<sup>-5</sup></b> | <b>1.12 (1.06-1.19)</b> | <b>1.5 x 10<sup>-2</sup></b>      | <b>++</b> |
| 17                                               | 11       | rs7481100         | A/G                    | 2.4 x 10 <sup>-5</sup>       | 1.41 (1.20-1.65)        | Inter             | A/G                    | 5.1 x 10 <sup>-1</sup>       | 1.04 (0.92-1.18)        | A/G                                                                | 2.4 x 10 <sup>-3</sup>       | 1.16 (1.05-1.28)        | 3.3 x 10 <sup>-3</sup>            | +-        |
| 18                                               | 11       | rs12420264        | T/C                    | 3.2 x 10 <sup>-5</sup>       | 1.40 (1.19-1.64)        | Inter             | T/C                    | 4.8 x 10 <sup>-1</sup>       | 1.04 (0.93-1.17)        | T/C                                                                | 3.6 x 10 <sup>-3</sup>       | 1.15 (1.05-1.26)        | 3.6 x 10 <sup>-3</sup>            | +-        |
| <b>19</b>                                        | <b>1</b> | <b>rs16826658</b> | <b>T/G</b>             | <b>3.5 x 10<sup>-5</sup></b> | <b>1.25 (1.13-1.39)</b> | <b>Inter</b>      | <b>T/G</b>             | <b>3.4 x 10<sup>-3</sup></b> | <b>1.10 (1.03-1.18)</b> | <b>T/G</b>                                                         | <b>1.5 x 10<sup>-6</sup></b> | <b>1.15 (1.08-1.21)</b> | <b>4.4 x 10<sup>-2</sup></b>      | <b>++</b> |
| 20                                               | 7        | rs767395          | G/A                    | 3.5 x 10 <sup>-5</sup>       | 1.25 (1.13-1.39)        | Inter             | G/A                    | 2.4 x 10 <sup>-2</sup>       | 0.93 (0.87-0.99)        | G/A                                                                | 6.4 x 10 <sup>-1</sup>       | 1.01 (0.96-1.07)        | 1.1 x 10 <sup>-6</sup>            | +-        |
| 21                                               | 1        | rs2421987         | A/G                    | 3.5 x 10 <sup>-5</sup>       | 1.25 (1.12-1.39)        | <i>DNM3</i>       | G/A                    | 8.8 x 10 <sup>-1</sup>       | 0.99 (0.91-1.09)        | A/G                                                                | 9.4 x 10 <sup>-3</sup>       | 1.09 (1.02-1.17)        | 2.5 x 10 <sup>-3</sup>            | +-        |
| 22                                               | 11       | rs12418031        | A/G                    | 3.7 x 10 <sup>-5</sup>       | 1.39 (1.19-1.63)        | Inter             | G/A                    | 4.8 x 10 <sup>-1</sup>       | 1.04 (0.93-1.17)        | A/G                                                                | 5.7 x 10 <sup>-2</sup>       | 1.09 (1.00-1.20)        | 1.7 x 10 <sup>-4</sup>            | +-        |
| 24                                               | 11       | rs4584564         | A/G                    | 3.9 x 10 <sup>-5</sup>       | 1.36 (1.17-1.57)        | Inter             | G/A                    | 3.2 x 10 <sup>-1</sup>       | 1.05 (0.96-1.14)        | A/G                                                                | 2.5 x 10 <sup>-1</sup>       | 1.05 (0.97-1.13)        | 7.4 x 10 <sup>-5</sup>            | +-        |
| 25                                               | 8        | rs13255500        | A/G                    | 3.9 x 10 <sup>-5</sup>       | 1.25 (1.12-1.39)        | <i>ANGPT1</i>     | A/G                    | 1.8 x 10 <sup>-1</sup>       | 0.94 (0.85-1.03)        | A/G                                                                | 1.0 x 10 <sup>-1</sup>       | 1.06 (0.99-1.14)        | 1.1 x 10 <sup>-4</sup>            | +-        |
| 26                                               | 8        | rs1433168         | C/T                    | 4.1 x 10 <sup>-5</sup>       | 1.26 (1.13-1.40)        | <i>ANGPT1</i>     | T/C                    | 5.2 x 10 <sup>-1</sup>       | 0.98 (0.92-1.05)        | C/T                                                                | 6.9 x 10 <sup>-3</sup>       | 1.08 (1.02-1.14)        | 1.2 x 10 <sup>-3</sup>            | +-        |
| 27                                               | 3        | rs9876198         | T/C                    | 4.1 x 10 <sup>-5</sup>       | 1.48 (1.23-1.78)        | Inter             | C/T                    | 1.1 x 10 <sup>-1</sup>       | 1.06 (0.99-1.13)        | T/C                                                                | 9.4 x 10 <sup>-1</sup>       | 1.00 (0.94-1.06)        | 8.7 x 10 <sup>-6</sup>            | +-        |
| 28                                               | 3        | rs2369950         | T/C                    | 4.1 x 10 <sup>-5</sup>       | 1.48 (1.23-1.78)        | Inter             | C/T                    | 1.1 x 10 <sup>-1</sup>       | 1.06 (0.99-1.13)        | T/C                                                                | 9.5 x 10 <sup>-1</sup>       | 1.00 (0.94-1.06)        | 8.8 x 10 <sup>-6</sup>            | +-        |
| <b>29</b>                                        | <b>1</b> | <b>rs7521902</b>  | <b>C/A</b>             | <b>4.2 x 10<sup>-5</sup></b> | <b>1.25 (1.12-1.39)</b> | <b>Inter</b>      | <b>C/A</b>             | <b>8.9 x 10<sup>-5</sup></b> | <b>1.16 (1.08-1.25)</b> | <b>C/A</b>                                                         | <b>4.2 x 10<sup>-8</sup></b> | <b>1.19 (1.12-1.27)</b> | <b>0.28</b>                       | <b>++</b> |

|           |          |                   |            |                              |                         |                     |            |                              |                         |            |                              |                         |                        |           |
|-----------|----------|-------------------|------------|------------------------------|-------------------------|---------------------|------------|------------------------------|-------------------------|------------|------------------------------|-------------------------|------------------------|-----------|
| 30        | 20       | rs6087487         | A/G        | 4.5 x 10 <sup>-5</sup>       | 1.33 (1.16-1.52)        | <i>SNTA1</i>        | A/G        | 1.2 x 10 <sup>-1</sup>       | 1.05 (0.99-1.13)        | A/G        | 1.4 x 10 <sup>-3</sup>       | 1.10 (1.04-1.17)        | 2.6 x 10 <sup>-3</sup> | ++        |
| 31        | 20       | rs293712          | A/G        | 4.8 x 10 <sup>-5</sup>       | 1.32 (1.15-1.52)        | Inter               | G/A        | 5.4 x 10 <sup>-1</sup>       | 0.98 (0.92-1.05)        | A/G        | 2.3 x 10 <sup>-2</sup>       | 1.07 (1.01-1.14)        | 1.0 x 10 <sup>-3</sup> | ++        |
| 32        | 3        | rs6763720         | A/G        | 5.1 x 10 <sup>-5</sup>       | 1.47 (1.22-1.77)        | Inter               | G/A        | 1.2 x 10 <sup>-1</sup>       | 1.06 (0.99-1.13)        | A/G        | 9.1 x 10 <sup>-1</sup>       | 1.00 (0.94-1.06)        | 1.4 x 10 <sup>-5</sup> | +-        |
| 33        | 8        | rs10098499        | C/T        | 5.1 x 10 <sup>-5</sup>       | 1.26 (1.12-1.40)        | <i>ANGPT1</i>       | T/C        | 6.8 x 10 <sup>-1</sup>       | 0.99 (0.92-1.05)        | C/T        | 2.6 x 10 <sup>-2</sup>       | 1.07 (1.01-1.13)        | 1.6 x 10 <sup>-3</sup> | ++        |
| 34        | 11       | rs989357          | A/G        | 5.3 x 10 <sup>-5</sup>       | 1.34 (1.16-1.55)        | Inter               | G/A        | 2.3 x 10 <sup>-1</sup>       | 1.05 (0.97-1.13)        | A/G        | 4.1 x 10 <sup>-1</sup>       | 1.03 (0.96-1.10)        | 4.7 x 10 <sup>-5</sup> | +-        |
| 35        | 3        | rs275365          | T/C        | 5.3 x 10 <sup>-5</sup>       | 1.28 (1.14-1.45)        | Inter               | T/C        | 6.0 x 10 <sup>-1</sup>       | 0.98 (0.91-1.06)        | T/C        | 6.1 x 10 <sup>-2</sup>       | 1.06 (1.00-1.13)        | 1.6 x 10 <sup>-4</sup> | +-        |
| 36        | 4        | rs9308012         | G/T        | 5.5 x 10 <sup>-5</sup>       | 1.25 (1.12-1.39)        | Inter               | G/T        | 4.3 x 10 <sup>-2</sup>       | 0.93 (0.88-1.00)        | G/T        | 7.7 x 10 <sup>-1</sup>       | 1.01 (0.95-1.07)        | 8.2 x 10 <sup>-6</sup> | +-        |
| 37        | 1        | rs4920421         | T/C        | 5.5 x 10 <sup>-5</sup>       | 1.33 (1.16-1.53)        | Inter               | C/T        | 1.9 x 10 <sup>-1</sup>       | 0.94 (0.86-1.03)        | T/C        | 9.2 x 10 <sup>-4</sup>       | 1.13 (1.05-1.22)        | 6.3 x 10 <sup>-3</sup> | ++        |
| 38        | 10       | rs11193670        | A/G        | 5.6 x 10 <sup>-5</sup>       | 1.26 (1.12-1.40)        | Inter               | G/A        | 4.1 x 10 <sup>-1</sup>       | 0.97 (0.91-1.04)        | A/G        | 8.6 x 10 <sup>-3</sup>       | 1.08 (1.02-1.15)        | 3.4 x 10 <sup>-3</sup> | ++        |
| 39        | 8        | rs13263947        | A/G        | 5.9 x 10 <sup>-5</sup>       | 1.24 (1.12-1.39)        | <i>ANGPT1</i>       | G/A        | 2.0 x 10 <sup>-1</sup>       | 0.93 (0.82-1.04)        | A/G        | 7.1 x 10 <sup>-5</sup>       | 1.17 (1.08-1.26)        | 8.4 x 10 <sup>-2</sup> | ++        |
| 41        | 12       | rs11054328        | T/C        | 5.9 x 10 <sup>-5</sup>       | 3.55 (1.85-6.79)        | <i>LOC100129640</i> | C/T        | 7.6 x 10 <sup>-2</sup>       | 0.91 (0.81-1.01)        | T/C        | 1.8 x 10 <sup>-2</sup>       | 1.14 (1.02-1.26)        | 5.2 x 10 <sup>-4</sup> | ++        |
| 42        | 11       | rs10899440        | A/G        | 6.3 x 10 <sup>-5</sup>       | 1.27 (1.13-1.43)        | <i>ALG8</i>         | A/G        | 8.4 x 10 <sup>-1</sup>       | 1.01 (0.94-1.08)        | A/G        | 3.2 x 10 <sup>-2</sup>       | 1.06 (1.01-1.13)        | 6.8 x 10 <sup>-4</sup> | ++        |
| 43        | 1        | rs10518295        | A/G        | 6.3 x 10 <sup>-5</sup>       | 1.40 (1.18-1.65)        | Inter               | G/A        | 1.7 x 10 <sup>-1</sup>       | 0.91 (0.80-1.04)        | A/G        | 5.2 x 10 <sup>-4</sup>       | 1.21 (1.08-1.34)        | 2.9 x 10 <sup>-2</sup> | ++        |
| 44        | 8        | rs13280030        | A/G        | 6.5 x 10 <sup>-5</sup>       | 1.24 (1.11-1.38)        | <i>ANGPT1</i>       | A/G        | 1.7 x 10 <sup>-1</sup>       | 0.93 (0.85-1.03)        | A/G        | 1.4 x 10 <sup>-1</sup>       | 1.06 (0.98-1.14)        | 1.6 x 10 <sup>-4</sup> | +-        |
| 45        | 1        | rs12030710        | A/G        | 6.5 x 10 <sup>-5</sup>       | 1.40 (1.18-1.65)        | <i>RPE65</i>        | G/A        | 1.6 x 10 <sup>-1</sup>       | 0.91 (0.79-1.04)        | A/G        | 4.8 x 10 <sup>-4</sup>       | 1.21 (1.09-1.34)        | 3.1 x 10 <sup>-2</sup> | ++        |
| 46        | 19       | rs2290650         | G/A        | 6.7 x 10 <sup>-5</sup>       | 1.36 (1.17-1.59)        | <i>FXVD3</i>        | A/G        | 2.7 x 10 <sup>-1</sup>       | 0.95 (0.86-1.04)        | G/A        | 2.3 x 10 <sup>-3</sup>       | 1.13 (1.04-1.22)        | 4.7 x 10 <sup>-3</sup> | ++        |
| 47        | 11       | rs1874445         | T/C        | 6.8 x 10 <sup>-5</sup>       | 2.19 (1.48-3.25)        | <i>MRVI1</i>        | C/T        | 1.7 x 10 <sup>-1</sup>       | 1.05 (0.98-1.12)        | T/C        | 4.9 x 10 <sup>-1</sup>       | 0.98 (0.91-1.04)        | 4.2 x 10 <sup>-5</sup> | +-        |
| 48        | 3        | rs674628          | G/A        | 6.9 x 10 <sup>-5</sup>       | 1.27 (1.13-1.43)        | Inter               | G/A        | 4.8 x 10 <sup>-1</sup>       | 0.98 (0.91-1.04)        | G/A        | 1.8 x 10 <sup>-1</sup>       | 1.04 (0.98-1.10)        | 1.2 x 10 <sup>-4</sup> | +-        |
| 49        | 1        | rs821426          | A/C        | 7.1 x 10 <sup>-5</sup>       | 1.30 (1.14-1.49)        | <i>PGLYRP3</i>      | A/C        | 3.8 x 10 <sup>-1</sup>       | 0.96 (0.88-1.05)        | A/C        | 1.3 x 10 <sup>-1</sup>       | 1.06 (0.98-1.14)        | 2.1 x 10 <sup>-4</sup> | +-        |
| 50        | 11       | rs4598655         | A/G        | 7.3 x 10 <sup>-5</sup>       | 1.34 (1.16-1.56)        | Inter               | A/G        | 2.2 x 10 <sup>-1</sup>       | 1.05 (0.97-1.13)        | A/G        | 3.5 x 10 <sup>-3</sup>       | 1.10 (1.03-1.18)        | 3.1 x 10 <sup>-3</sup> | ++        |
| 51        | 6        | rs3020348         | C/A        | 7.5 x 10 <sup>-5</sup>       | 1.29 (1.14-1.47)        | <i>ESR1</i>         | A/C        | 6.4 x 10 <sup>-1</sup>       | 0.98 (0.92-1.05)        | C/A        | 2.0 x 10 <sup>-2</sup>       | 1.07 (1.01-1.14)        | 8.4 x 10 <sup>-4</sup> | ++        |
| 53        | 1        | rs664673          | C/T        | 7.7 x 10 <sup>-5</sup>       | 1.51 (1.23-1.87)        | Inter               | T/C        | 9.1 x 10 <sup>-1</sup>       | 1 (0.93-1.06)           | C/T        | 1.8 x 10 <sup>-1</sup>       | 1.04 (0.98-1.11)        | 2.1 x 10 <sup>-4</sup> | ++        |
| <b>54</b> | <b>6</b> | <b>rs16900375</b> | <b>G/A</b> | <b>7.9 x 10<sup>-5</sup></b> | <b>1.31 (1.15-1.49)</b> | <b>Inter</b>        | <b>G/A</b> | <b>4.3 x 10<sup>-2</sup></b> | <b>1.24 (1.01-1.54)</b> | <b>G/A</b> | <b>6.5 x 10<sup>-6</sup></b> | <b>1.29 (1.16-1.44)</b> | <b>0.67</b>            | <b>++</b> |
| 55        | 13       | rs4773225         | A/G        | 7.9 x 10 <sup>-5</sup>       | 1.24 (1.11-1.38)        | Inter               | G/A        | 5.7 x 10 <sup>-1</sup>       | 0.98 (0.92-1.05)        | A/G        | 1.5 x 10 <sup>-2</sup>       | 1.07 (1.01-1.13)        | 2.8 x 10 <sup>-3</sup> | ++        |
| 56        | 20       | rs11907901        | T/C        | 7.9 x 10 <sup>-5</sup>       | 1.31 (1.15-1.51)        | Inter               | T/C        | 4.1 x 10 <sup>-1</sup>       | 1.03 (0.96-1.10)        | T/C        | 1.0 x 10 <sup>-2</sup>       | 1.08 (1.02-1.15)        | 1.1 x 10 <sup>-3</sup> | ++        |
| 57        | 1        | rs12405430        | G/T        | 8.0 x 10 <sup>-5</sup>       | 1.27 (1.13-1.43)        | Inter               | T/G        | 1.8 x 10 <sup>-1</sup>       | 1.05 (0.98-1.12)        | G/T        | 4.1 x 10 <sup>-1</sup>       | 1.02 (0.97-1.09)        | 3.4 x 10 <sup>-5</sup> | +-        |
| 58        | 13       | rs7317733         | A/C        | 8.3 x 10 <sup>-5</sup>       | 1.25 (1.12-1.40)        | <i>COL4A2</i>       | C/A        | 6.2 x 10 <sup>-2</sup>       | 1.06 (1.00-1.14)        | A/C        | 6.7 x 10 <sup>-1</sup>       | 1.01 (0.96-1.07)        | 1.2 x 10 <sup>-5</sup> | +-        |
| 60        | 1        | rs10753536        | A/G        | 8.9 x 10 <sup>-5</sup>       | 1.25 (1.12-1.39)        | Inter               | G/A        | 5.6 x 10 <sup>-2</sup>       | 0.94 (0.88-1.00)        | A/G        | 2.1 x 10 <sup>-4</sup>       | 1.11 (1.05-1.18)        | 1.6 x 10 <sup>-2</sup> | ++        |
| 61        | 6        | rs3020343         | C/T        | 9.6 x 10 <sup>-5</sup>       | 1.29 (1.13-1.46)        | <i>ESR1</i>         | T/C        | 5.3 x 10 <sup>-1</sup>       | 0.98 (0.92-1.05)        | C/T        | 2.5 x 10 <sup>-2</sup>       | 1.07 (1.01-1.13)        | 1.9 x 10 <sup>-3</sup> | ++        |
| 62        | 3        | rs6780855         | A/C        | 9.7 x 10 <sup>-5</sup>       | 1.42 (1.19-1.70)        | Inter               | C/A        | 9.1 x 10 <sup>-2</sup>       | 1.07 (0.99-1.15)        | A/C        | 9.7 x 10 <sup>-1</sup>       | 1.00 (0.93-1.07)        | 2.2 x 10 <sup>-5</sup> | +-        |
| 63        | 1        | rs2473277         | A/G        | 1.0 x 10 <sup>-4</sup>       | 1.25 (1.12-1.41)        | Inter               | A/G        | 1.4 x 10 <sup>-1</sup>       | 1.05 (0.98-1.12)        | A/G        | 9.9 x 10 <sup>-4</sup>       | 1.10 (1.04-1.16)        | 7.5 x 10 <sup>-3</sup> | ++        |
| 64        | 8        | rs13271465        | C/T        | 1.1 x 10 <sup>-4</sup>       | 1.23 (1.11-1.37)        | Inter               | C/T        | 3.7 x 10 <sup>-1</sup>       | 1.04 (0.95-1.15)        | C/T        | 8.7 x 10 <sup>-4</sup>       | 1.12 (1.05-1.21)        | 2.1 x 10 <sup>-2</sup> | ++        |
| 65        | 3        | rs279545          | G/A        | 1.1 x 10 <sup>-4</sup>       | 1.29 (1.13-1.46)        | <i>IL17RC</i>       | A/G        | 3.2 x 10 <sup>-1</sup>       | 0.96 (0.89-1.04)        | G/A        | 5.1 x 10 <sup>-3</sup>       | 1.10 (1.03-1.18)        | 6.7 x 10 <sup>-3</sup> | ++        |
| 66        | 8        | rs951759          | C/A        | 1.1 x 10 <sup>-4</sup>       | 1.24 (1.11-1.39)        | <i>ANGPT1</i>       | C/A        | 3.6 x 10 <sup>-1</sup>       | 0.97 (0.91-1.04)        | C/A        | 2.3 x 10 <sup>-1</sup>       | 1.04 (0.98-1.10)        | 1.9 x 10 <sup>-4</sup> | +-        |
| 67        | 20       | rs910397          | T/C        | 1.1 x 10 <sup>-4</sup>       | 1.29 (1.13-1.46)        | <i>PXMP4</i>        | C/T        | 1.8 x 10 <sup>-1</sup>       | 1.05 (0.98-1.12)        | T/C        | 6.3 x 10 <sup>-1</sup>       | 1.01 (0.96-1.08)        | 7.1 x 10 <sup>-5</sup> | +-        |

|           |          |                   |            |                              |                         |                     |            |                              |                         |            |                              |                         |                              |           |
|-----------|----------|-------------------|------------|------------------------------|-------------------------|---------------------|------------|------------------------------|-------------------------|------------|------------------------------|-------------------------|------------------------------|-----------|
| 68        | 12       | rs10862978        | C/T        | 1.1 x 10 <sup>-4</sup>       | 1.35 (1.16-1.58)        | <i>E2F7</i>         | T/C        | 1.6 x 10 <sup>-1</sup>       | 0.94 (0.86-1.02)        | C/T        | 1.8 x 10 <sup>-3</sup>       | 1.13 (1.05-1.21)        | 7.0 x 10 <sup>-2</sup>       | +-        |
| 69        | 13       | rs9555714         | A/G        | 1.2 x 10 <sup>-4</sup>       | 1.24 (1.11-1.39)        | <i>COL4A2</i>       | A/G        | 2.4 x 10 <sup>-1</sup>       | 1.04 (0.97-1.11)        | A/G        | 3.2 x 10 <sup>-3</sup>       | 1.09 (1.03-1.15)        | 7.5 x 10 <sup>-3</sup>       | +-        |
| 70        | 19       | rs4807140         | C/T        | 1.2 x 10 <sup>-4</sup>       | 1.23 (1.11-1.37)        | <i>ONECUT3</i>      | C/T        | 8.4 x 10 <sup>-1</sup>       | 1.01 (0.94-1.08)        | C/T        | 2.1 x 10 <sup>-2</sup>       | 1.07 (1.01-1.13)        | 1.3 x 10 <sup>-3</sup>       | +-        |
| 71        | 9        | rs7851482         | T/G        | 1.2 x 10 <sup>-4</sup>       | 1.25 (1.12-1.40)        | Inter               | G/T        | 6.9 x 10 <sup>-1</sup>       | 0.99 (0.92-1.05)        | T/G        | 1.6 x 10 <sup>-2</sup>       | 1.07 (1.01-1.13)        | 1.3 x 10 <sup>-3</sup>       | +-        |
| 72        | 8        | rs11991529        | T/C        | 1.2 x 10 <sup>-4</sup>       | 1.23 (1.11-1.37)        | <i>ANGPT1</i>       | C/T        | 2.3 x 10 <sup>-1</sup>       | 0.93 (0.83-1.05)        | T/C        | 1.6 x 10 <sup>-4</sup>       | 1.16 (1.07-1.25)        | 9.4 x 10 <sup>-2</sup>       | +-        |
| 73        | 2        | rs1027928         | G/A        | 1.3 x 10 <sup>-4</sup>       | 1.24 (1.11-1.39)        | Inter               | G/A        | 2.6 x 10 <sup>-1</sup>       | 0.95 (0.87-1.04)        | G/A        | 1.5 x 10 <sup>-1</sup>       | 1.05 (0.98-1.12)        | 2.1 x 10 <sup>-4</sup>       | +-        |
| 74        | 22       | rs13056641        | A/G        | 1.3 x 10 <sup>-4</sup>       | 1.34 (1.16-1.56)        | <i>KIAA1671</i>     | G/A        | 6.0 x 10 <sup>-1</sup>       | 0.98 (0.90-1.06)        | A/G        | 1.6 x 10 <sup>-2</sup>       | 1.09 (1.02-1.17)        | 1.4 x 10 <sup>-3</sup>       | +-        |
| 75        | 12       | rs7978167         | A/G        | 1.4 x 10 <sup>-4</sup>       | 1.45 (1.21-1.75)        | <i>TM7SF3</i>       | G/A        | 4.0 x 10 <sup>-1</sup>       | 1.05 (0.94-1.17)        | A/G        | 1.8 x 10 <sup>-1</sup>       | 1.07 (0.97-1.17)        | 1.0 x 10 <sup>-4</sup>       | +-        |
| <b>76</b> | <b>6</b> | <b>rs9487982</b>  | <b>T/C</b> | <b>1.4 x 10<sup>-4</sup></b> | <b>1.45 (1.20-1.75)</b> | <b>Inter</b>        | <b>C/T</b> | <b>7.9 x 10<sup>-3</sup></b> | <b>0.86 (0.78-0.96)</b> | <b>T/C</b> | <b>2.5 x 10<sup>-5</sup></b> | <b>1.22 (1.11-1.34)</b> | <b>4.2 x 10<sup>-2</sup></b> | <b>++</b> |
| 77        | 10       | rs17413155        | G/T        | 1.4 x 10 <sup>-4</sup>       | 1.37 (1.16-1.60)        | <i>NRP1</i>         | T/G        | 5.5 x 10 <sup>-1</sup>       | 1.03 (0.94-1.12)        | G/T        | 2.5 x 10 <sup>-1</sup>       | 1.05 (0.97-1.13)        | 3.5 x 10 <sup>-4</sup>       | +-        |
| 78        | 6        | rs7739145         | T/G        | 1.5 x 10 <sup>-4</sup>       | 1.44 (1.19-1.75)        | Inter               | T/G        | 1.1 x 10 <sup>-2</sup>       | 0.87 (0.78-0.97)        | T/G        | 6.9 x 10 <sup>-1</sup>       | 0.98 (0.89-1.08)        | 6.2 x 10 <sup>-6</sup>       | +-        |
| 79        | 4        | rs2007366         | T/G        | 1.5 x 10 <sup>-4</sup>       | 1.53 (1.23-1.91)        | Inter               | T/G        | 3.3 x 10 <sup>-1</sup>       | 0.97 (0.90-1.04)        | T/G        | 8.0 x 10 <sup>-1</sup>       | 1.01 (0.94-1.08)        | 8.4 x 10 <sup>-5</sup>       | +-        |
| 80        | 4        | rs4835286         | A/C        | 1.5 x 10 <sup>-4</sup>       | 1.53 (1.23-1.91)        | Inter               | A/C        | 2.4 x 10 <sup>-1</sup>       | 0.96 (0.89-1.03)        | A/C        | 9.3 x 10 <sup>-1</sup>       | 1.00 (0.94-1.07)        | 6.6 x 10 <sup>-5</sup>       | +-        |
| 81        | 1        | rs2802841         | G/A        | 1.5 x 10 <sup>-4</sup>       | 1.35 (1.16-1.57)        | <i>NFASC</i>        | G/A        | 1.2 x 10 <sup>-1</sup>       | 0.95 (0.89-1.01)        | G/A        | 9.2 x 10 <sup>-1</sup>       | 1.00 (0.94-1.06)        | 2.9 x 10 <sup>-5</sup>       | +-        |
| 82        | 12       | rs16944632        | T/C        | 1.5 x 10 <sup>-4</sup>       | 1.86 (1.34-2.58)        | Inter               | C/T        | 2.8 x 10 <sup>-1</sup>       | 1.1 (0.93-1.29)         | T/C        | 4.7 x 10 <sup>-1</sup>       | 1.06 (0.91-1.22)        | 1.5 x 10 <sup>-4</sup>       | +-        |
| 83        | 1        | rs983332          | T/G        | 1.5 x 10 <sup>-4</sup>       | 1.26 (1.12-1.42)        | Inter               | G/T        | 8.1 x 10 <sup>-1</sup>       | 1.01 (0.93-1.10)        | T/G        | 4.1 x 10 <sup>-2</sup>       | 1.07 (1.00-1.15)        | 1.1 x 10 <sup>-3</sup>       | +-        |
| 86        | 1        | rs2146901         | T/C        | 1.6 x 10 <sup>-4</sup>       | 1.22 (1.10-1.36)        | <i>LOC100128178</i> | T/C        | 6.8 x 10 <sup>-1</sup>       | 1.02 (0.93-1.11)        | T/C        | 6.6 x 10 <sup>-3</sup>       | 1.10 (1.03-1.17)        | 8.4 x 10 <sup>-3</sup>       | +-        |
| 87        | 8        | rs1559681         | C/T        | 1.6 x 10 <sup>-4</sup>       | 1.42 (1.18-1.71)        | Inter               | T/C        | 4.3 x 10 <sup>-1</sup>       | 1.03 (0.96-1.10)        | C/T        | 5.7 x 10 <sup>-1</sup>       | 1.02 (0.95-1.09)        | 1.7 x 10 <sup>-4</sup>       | +-        |
| 88        | 8        | rs892248          | G/A        | 1.6 x 10 <sup>-4</sup>       | 1.27 (1.12-1.44)        | <i>ANGPT1</i>       | A/G        | 3.4 x 10 <sup>-1</sup>       | 0.96 (0.89-1.04)        | G/A        | 5.9 x 10 <sup>-3</sup>       | 1.10 (1.03-1.17)        | 7.3 x 10 <sup>-3</sup>       | +-        |
| 89        | 8        | rs10086318        | G/A        | 1.6 x 10 <sup>-4</sup>       | 1.23 (1.10-1.37)        | Inter               | G/A        | 5.5 x 10 <sup>-1</sup>       | 1.02 (0.95-1.09)        | G/A        | 1.6 x 10 <sup>-2</sup>       | 1.07 (1.01-1.14)        | 5.2 x 10 <sup>-3</sup>       | +-        |
| 90        | 9        | rs10511833        | A/G        | 1.6 x 10 <sup>-4</sup>       | 1.26 (1.12-1.42)        | Inter               | A/G        | 8.7 x 10 <sup>-1</sup>       | 0.99 (0.93-1.07)        | A/G        | 7.1 x 10 <sup>-2</sup>       | 1.06 (1.00-1.12)        | 6.8 x 10 <sup>-4</sup>       | +-        |
| <b>91</b> | <b>1</b> | <b>rs12028945</b> | <b>A/G</b> | <b>1.6 x 10<sup>-4</sup></b> | <b>1.32 (1.15-1.53)</b> | <b>IL28RA</b>       | <b>G/A</b> | <b>2.5 x 10<sup>-2</sup></b> | <b>0.89 (0.80-0.99)</b> | <b>A/G</b> | <b>2.9 x 10<sup>-5</sup></b> | <b>1.20 (1.10-1.30)</b> | <b>8.0 x 10<sup>-2</sup></b> | <b>++</b> |
| 92        | 9        | rs10511885        | A/G        | 1.7 x 10 <sup>-4</sup>       | 1.24 (1.11-1.39)        | Inter               | G/A        | 3.8 x 10 <sup>-1</sup>       | 0.97 (0.91-1.04)        | A/G        | 7.2 x 10 <sup>-3</sup>       | 1.08 (1.02-1.14)        | 4.6 x 10 <sup>-3</sup>       | +-        |
| 93        | 9        | rs10511886        | T/C        | 1.7 x 10 <sup>-4</sup>       | 1.24 (1.11-1.39)        | Inter               | C/T        | 4.1 x 10 <sup>-1</sup>       | 0.97 (0.91-1.04)        | T/C        | 7.1 x 10 <sup>-3</sup>       | 1.08 (1.02-1.15)        | 4.9 x 10 <sup>-3</sup>       | +-        |
| <b>94</b> | <b>1</b> | <b>rs3121310</b>  | <b>G/A</b> | <b>1.7 x 10<sup>-4</sup></b> | 1.24 (1.11-1.39)        | <b>WNT3A</b>        | <b>G/A</b> | <b>1.2 x 10<sup>-2</sup></b> | <b>1.09 (1.02-1.17)</b> | <b>G/A</b> | <b>3.6 x 10<sup>-5</sup></b> | <b>1.13 (1.07-1.20)</b> | <b>5.6 x 10<sup>-2</sup></b> | <b>++</b> |
| 95        | 12       | rs7305123         | C/T        | 1.7 x 10 <sup>-4</sup>       | 1.36 (1.16-1.59)        | Inter               | T/C        | 3.9 x 10 <sup>-1</sup>       | 0.97 (0.89-1.05)        | C/T        | 1.4 x 10 <sup>-2</sup>       | 1.09 (1.02-1.17)        | 2.6 x 10 <sup>-3</sup>       | +-        |
| 96        | 13       | rs9585276         | A/G        | 1.7 x 10 <sup>-4</sup>       | 1.23 (1.10-1.36)        | Inter               | G/A        | 2.3 x 10 <sup>-2</sup>       | 1.09 (1.01-1.17)        | A/G        | 9.5 x 10 <sup>-1</sup>       | 1.00 (0.94-1.06)        | 1.8 x 10 <sup>-5</sup>       | +-        |
| 98        | 14       | rs854384          | T/C        | 1.8 x 10 <sup>-4</sup>       | 7.25 (2.15-24.41)       | Inter               | C/T        | 2.5 x 10 <sup>-1</sup>       | 1.05 (0.97-1.14)        | T/C        | 3.4 x 10 <sup>-1</sup>       | 0.96 (0.89-1.04)        | 1.1 x 10 <sup>-3</sup>       | +-        |
| 99        | 3        | rs9821034         | A/G        | 1.8 x 10 <sup>-4</sup>       | 1.31 (1.14-1.51)        | Inter               | A/G        | 4.8 x 10 <sup>-2</sup>       | 0.94 (0.88-1.00)        | A/G        | 8.7 x 10 <sup>-1</sup>       | 1.00 (0.94-1.06)        | 1.8 x 10 <sup>-5</sup>       | +-        |
| 100       | 20       | rs6061641         | A/C        | 1.8 x 10 <sup>-4</sup>       | 1.27 (1.12-1.44)        | <i>CDH4</i>         | C/A        | 4.1 x 10 <sup>-1</sup>       | 1.03 (0.95-1.12)        | A/C        | 1.9 x 10 <sup>-1</sup>       | 1.05 (0.98-1.12)        | 3.3 x 10 <sup>-4</sup>       | +-        |

<sup>a</sup> SNP order and *P-values* as in Uno *et al.* (2010)<sup>26</sup>

<sup>b</sup> Reference allele/other allele, with ORs calculated against the reference allele for each study.

<sup>c</sup> Gene name is provided if the genotyped SNP is located in upstream, 3'UTR, intronic, exonic, 5'UTR, or downstream regions of that gene as annotated by Ensembl Genome Browser GRCh37 (Feb 2009). *Inter* denotes a SNP is located in an intergenic region.



<sup>d</sup> *P* value for Cochran's Q statistic (indicating heterogeneity between study results) as implemented in PLINK<sup>35</sup>

<sup>e</sup> Direction of effect of ORs for Uno *et al.* (2010)<sup>26</sup> and QIMR+Oxford "all" endometriosis GWA data sets, calculated against the same reference allele.

**Supplementary Figure 1** Post-QC Q-Q plots assessing genomic inflation of observed vs. expected chisquare statistic a) comparing women vs men among WTCCC and QIMR controls; b) in GWA of Oxford/WTCCC, QIMR/QIMR and c) combined datasets.

**a. i. WTCCC2 controls**

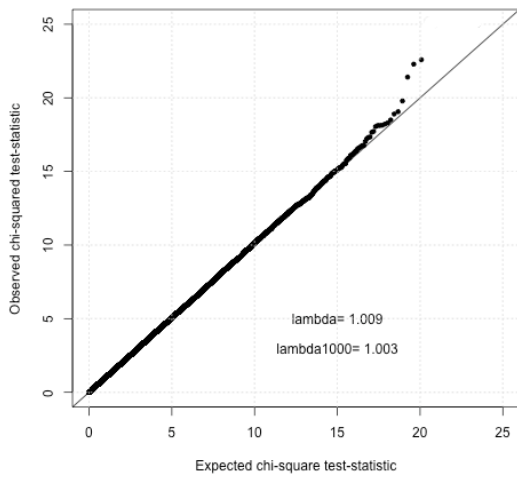

**ii. QIMR controls**

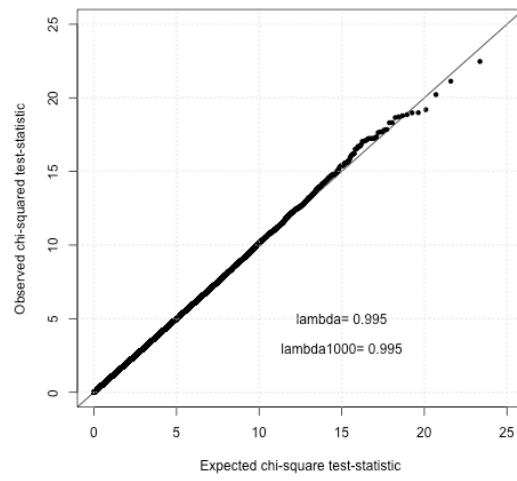

**b. i. Oxford**

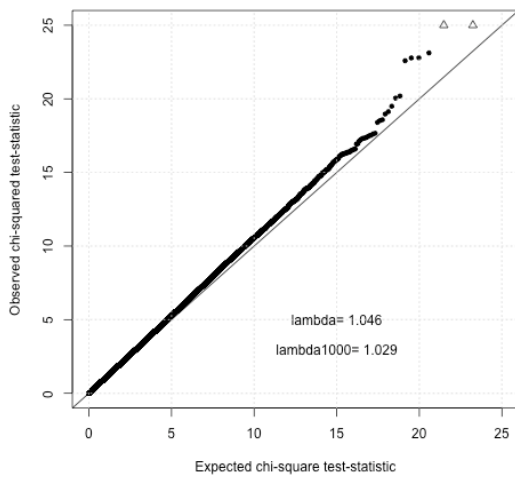

**ii. QIMR**

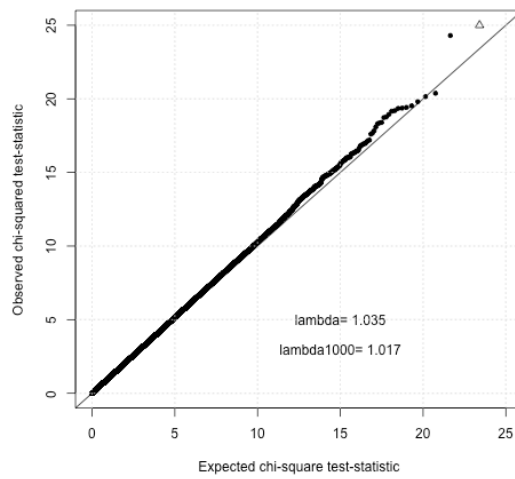

**iii. QIMR + Oxford**

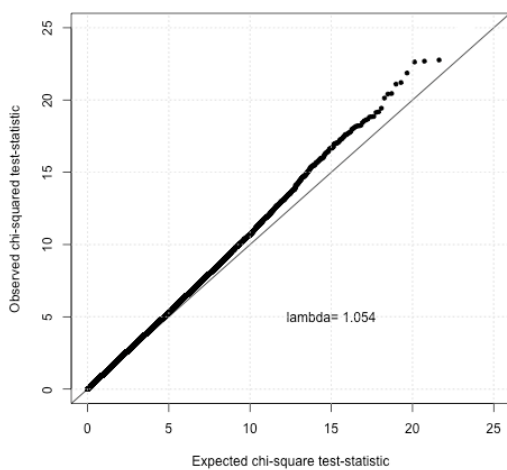

**Supplementary Figure 2.** Allele specific score prediction for “all” and stage B endometriosis, using (a, b) QIMR as discovery and Oxford as target datasets and (c, d) Oxford as discovery and QIMR as target datasets. Variance explained in the target dataset on the basis of scores derived in the discovery dataset for eight significance thresholds ( $P < 0.01$ ,  $P < 0.05$ ,  $P < 0.1$ ,  $P < 0.2$ ,  $P < 0.3$ ,  $P < 0.4$ ,  $P < 0.5$ ,  $P < 0.75$ , plotted left to right in each study). The y-axis indicates Nagelkerke’s pseudo  $R^2$  representing the proportion of variance explained. The number above each bar is the p-value for the target dataset analysis. Together, these figures show that the results were not driven by a few highly associated regions, indicating a substantial number of common variants underlying disease.

**QIMR as discovery, Oxford as target**

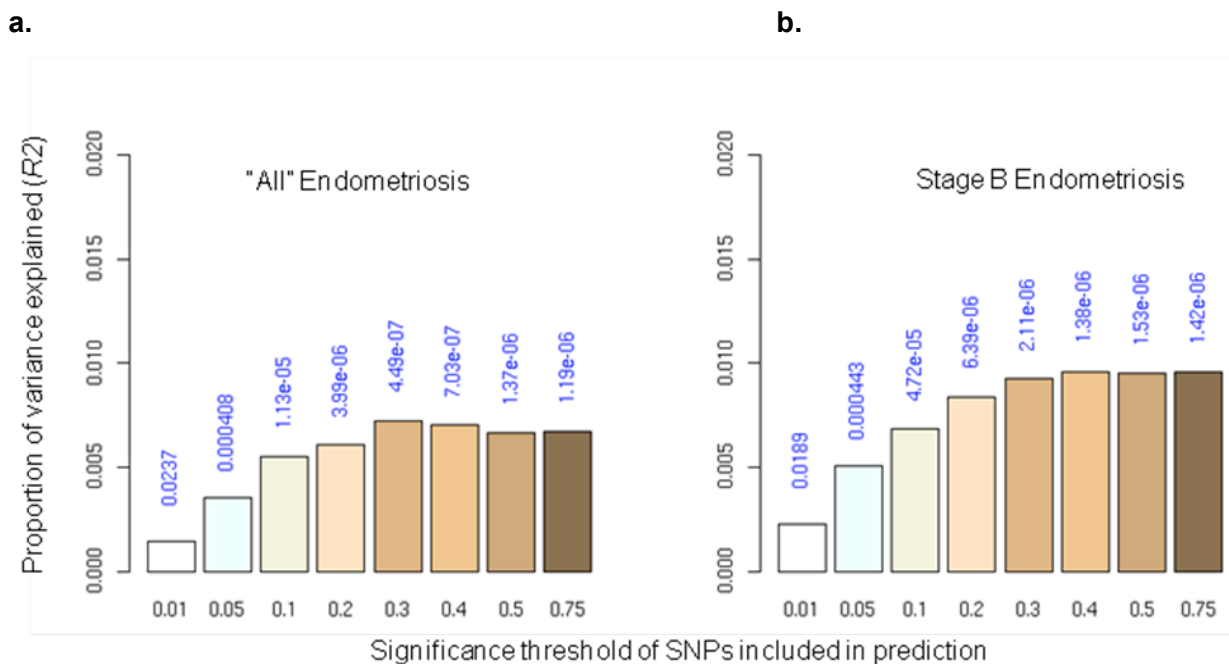

**Oxford as discovery, QIMR as target**

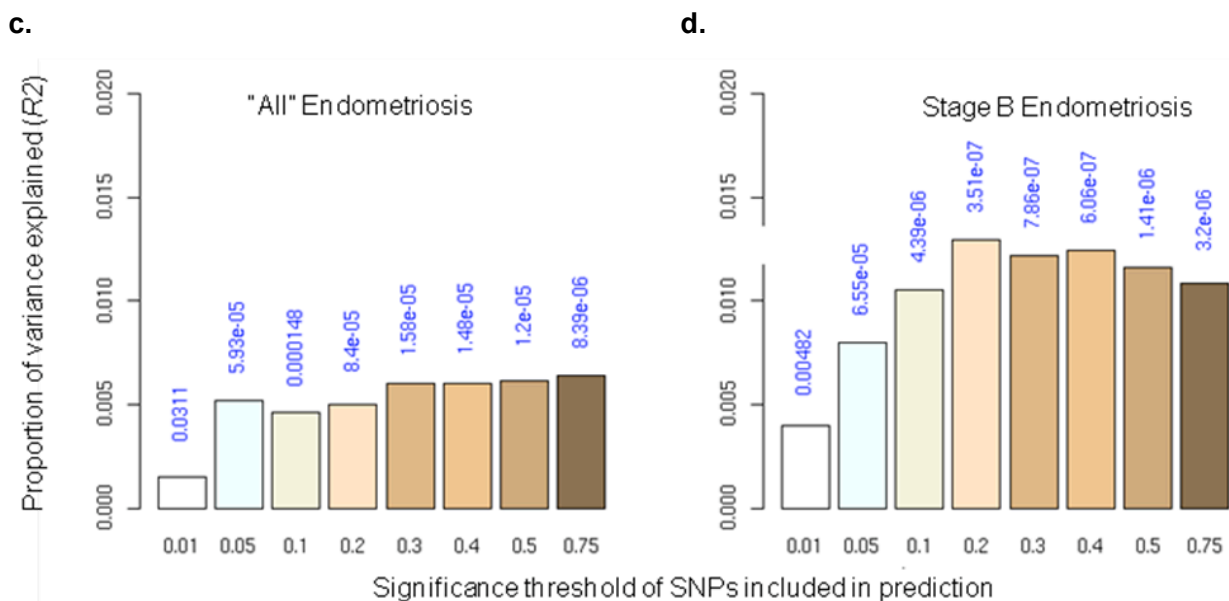

**Supplementary Figure 3.** Genome-wide association results from Cochran-Mantel-Haenszel tests for (a) “all” endometriosis and (b) stage B endometriosis in QIMR and Oxford datasets. Green points indicate SNPs with  $P < 1 \times 10^{-5}$ .

**A.**

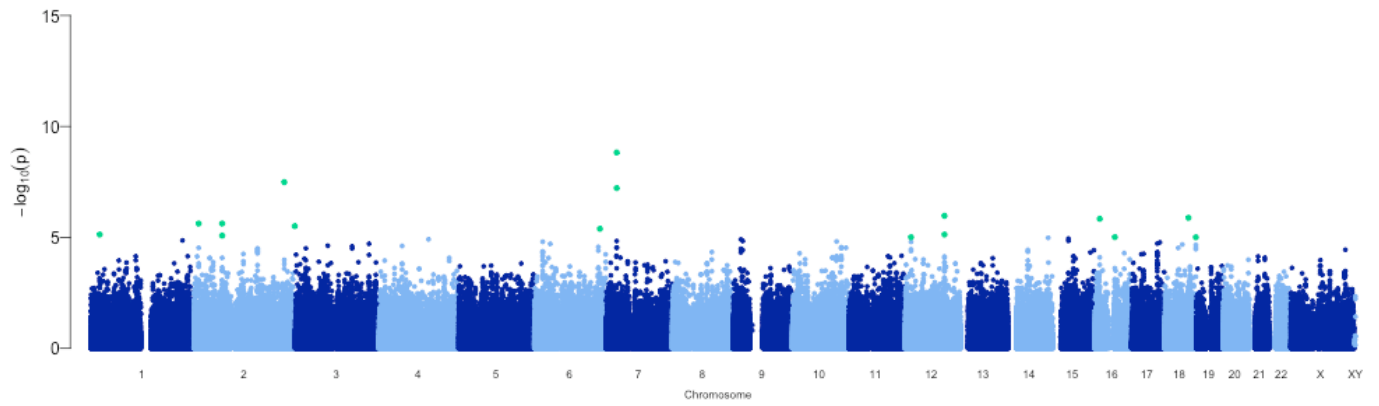

**B.**

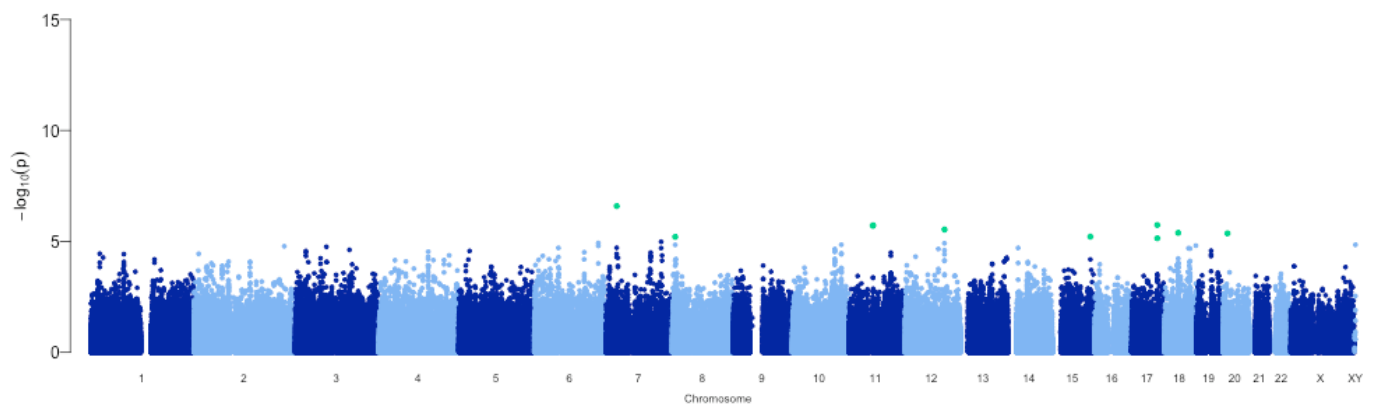

Supplement: NIHMS33578-supplement-1.pdf [file NIHMS33578-supplement-1.pdf]
